1 **Conditional *nmy-1* and *nmy-2* alleles establish that non-muscle myosins are**  
2 **required for late *C. elegans* embryonic elongation**  
3  
4  
5

---

6 **Kelly Molnar<sup>1,2</sup>, Shashi Kumar Suman<sup>1,3</sup>, Jeanne Eichelbrenner<sup>1,4</sup>, Camille N. Plancke<sup>1,5</sup>, François**  
7 **B. Robin<sup>1</sup>, Michel Labouesse<sup>1\*</sup>,**  
8

9 <sup>1</sup> Laboratoire de Biologie du Développement - UMR7622, Institut de Biologie Paris Seine, Sorbonne  
10 Université, 7-9 quai Saint Bernard 75005 Paris, France.

11 <sup>2</sup> Present Address: Laboratoire Matière et Systèmes Complexes, Université Paris Cité – CNRS  
12 UMR7057, 10 Rue Alice Domon et Léonie Duquet - 75013 Paris, France

13 <sup>3</sup> Present Address: Development and stem cell program, IGBMC, UMR7104, U964, Université de  
14 Strasbourg, 1 rue Laurent Fries, BP10142, 67400 Illkirch, France

15 <sup>4</sup> Present Address: CIML - UMR7280, 163 avenue de Luminy, 13288 Marseille Cedex 09, France

16 <sup>5</sup> Present address: Institut Pierre-Gilles de Gennes for Microfluidics, 6 rue Jean Calvin 75005 Paris,  
17 France

18  
19 \* Author for correspondence: [michel.labouesse@sorbonne-universite.fr](mailto:michel.labouesse@sorbonne-universite.fr)  
20  
21  
22  
23

24 **ABSTRACT**

25

26 The elongation of *C. elegans* embryos allows examination of mechanical interactions between  
27 adjacent tissues. Muscle contractions during late elongation induce the remodelling of  
28 epidermal circumferential actin filaments through mechanotransduction. We investigated the  
29 possible role of the non-muscle myosins NMY-1 and NMY-2 in this process using *nmy-1* and  
30 *nmy-2* thermosensitive alleles. Our findings suggest these myosins act redundantly in late  
31 elongation, and that they are involved in the multi-step process of epidermal remodeling. When  
32 inactivated, NMY-1 was seen to form protein aggregates.

33

34

35 **Keywords:** *C. elegans*, morphogenesis, non-muscle myosin, mechanotransduction,  
36 aggregates

37

38

39 **INTRODUCTION**

40

41 Morphogenesis refers to the process by which organisms gradually develop a characteristic 3D  
42 form. This can involve an increase in the number of cells, or a change in the configuration of  
43 their relative positions, which is accompanied by modifications in their cell-cell membrane  
44 adhesions (Lecuit, 2005). Multicellular organisms need to spatiotemporally coordinate the  
45 morphogenesis of multiple tissues in time and space (GILMOUR *et al.* 2017; GOODWIN AND  
46 NELSON 2021). It has become clear that communication through mechanical inputs plays a key  
47 role in ensuring the smooth development of adjacent tissues (AIGOUY *et al.* 2010; ZHANG *et*  
48 *al.* 2011; COLLINET *et al.* 2015; LYE *et al.* 2015). A classical paradigm is that a protein  
49 associated with a transmembrane receptor, such as integrin or E-cadherin, undergoes a  
50 conformational change that favours the binding of additional proteins. In turn, this can influence  
51 protein trafficking, the orientation of planar polarity, junction remodelling, cytoskeleton

52 dynamics, or the translocation of transcription factors to the nucleus, to name a few (DEL RIO  
53 *et al.* 2009; AIGOUY *et al.* 2010; LE DUC *et al.* 2010; YONEMURA *et al.* 2010; LEVAYER *et al.*  
54 2011; ZHANG *et al.* 2011; LARDENNOIS *et al.* 2019).

55 Although, several of the proteins relaying mechanical stress within a cell have been identified,  
56 we are far from a detailed understanding of all mechanotransductive pathways (MOORE *et al.*  
57 2010; HU *et al.* 2017; YAP *et al.* 2018; NIETHAMMER 2021). In particular, tissue morphogenesis  
58 generally involves repeated mechanical inputs resulting in progressive shape changes (MARTIN  
59 *et al.* 2009; SOLON *et al.* 2009; AIGOUY *et al.* 2010; RAUZI *et al.* 2010; ZHANG *et al.* 2011;  
60 MAITRE *et al.* 2015; LARDENNOIS *et al.* 2019), but the mechanisms involved in stabilizing cell  
61 shapes are only beginning to be discovered. Recent results have emphasized the importance of  
62 permanent viscoplastic changes induced by repeated mechanical inputs and the key role of the  
63 actomyosin cortex (BONAKDAR *et al.* 2016; DOUBROVINSKI *et al.* 2017; KHALILGHARIBI *et al.*  
64 2019; LARDENNOIS *et al.* 2019; STADDON *et al.* 2019; MOLNAR AND LABOUESSE 2021).

65 *C. elegans* represents a powerful system to analyze the consequences of mechanical inputs.  
66 During *C. elegans* embryonic morphogenesis, an ellipsoidal cell aggregate elongates fourfold  
67 into a vermiform shape (Priess & Hirsh, 1986). This occurs in two distinct stages and relies on  
68 epidermal cell shape change (Vuong-Brender *et al.*, 2016). The mechanical input comes from  
69 the epidermal actomyosin cortex and from the muscles for the early and late stages of  
70 elongation, respectively (WILLIAMS AND WATERSTON 1994; PIEKNY *et al.* 2003; GALLY *et al.*  
71 2009; ZHANG *et al.* 2011).

72 The early stage involves two distinct groups of epidermal cells, the lateral and dorsal/ventral  
73 cells. In the lateral cells, there is a greater concentration of non-muscle myosin and a disordered  
74 actin network (PIEKNY *et al.* 2003; GALLY *et al.* 2009). Contractions from these two zones  
75 flanking the embryo on either side provide the force from the one-fold to roughly 2-fold stages,

76 at which point the muscles become active (VUONG-BRENDER *et al.* 2017). Equally important  
77 are the actin filaments in the dorsal/ventral cells, which are arranged circumferentially and  
78 make bundles of a few distinct filaments, which provide integrity along the body and cause the  
79 force generated by the lateral cells to be directed to the tips of the embryo (VUONG-BRENDER  
80 *et al.* 2017).

81 The late stage begins when the muscles are in place and begin to contract (WILLIAMS AND  
82 WATERSTON 1994), at which point the actomyosin cortex in the lateral cells has achieved a  
83 circumferential pattern as well (GILLARD *et al.* 2019). Muscles are arranged into four bands just  
84 underneath the epidermis to which they are tightly attached, such that muscle contractions  
85 induce deformation of epidermal cells (ZHANG AND LABOUESSE 2010; ZHANG *et al.* 2011). In  
86 particular, muscle activity transiently bends the actin bundles beyond a critical angle (Fig. 1A),  
87 shown *in vitro* to induce severing by cofilin (MCCULLOUGH *et al.* 2011); in *C. elegans* the  
88 severing proteins are villin and gelsolin instead (LARDENNOIS *et al.* 2019). Actin filaments are  
89 then restabilized by the p21-activated kinase PAK-1, the alpha-spectrin SPC-1 and the atypical  
90 formin FHOD-1 (Fig. 1A) (LARDENNOIS *et al.* 2019). In the absence of PAK-1 and SPC-1, or  
91 FHOD-1 and SPC-1, embryos elongate up to the 1.5-fold stage and then regress to their initial  
92 lima bean shape (roughly 1.2-fold stage) due to the loss of actin filament integrity (LARDENNOIS  
93 *et al.* 2019). Thereby muscles contribute to progressively shorten actin filaments, promote  
94 embryo elongation and decrease their diameter.

95 The model described above assumes that the ends of severed actin filaments do not get much  
96 further apart before they get restabilized by the PAK-1/SPC-1/FHOD-1 complex. However,  
97 this might not be the case since hydrostatic pressure exerts a radial force that could be expected  
98 to pull those actin ends if they are not held together. Since muscles are arranged orthogonally  
99 to actin bundles, they cannot contribute to bring actin ends closer. We thus wondered whether

100 there might be additional players holding actin filaments once severed, and/or bringing them  
101 closer before handing them over to PAK-1/SPC-1/FHOD-1 (Fig. 1).

102 Although spectrins are actin-binding proteins that could fulfil the ascribed function of holding  
103 actin ends (LENNE *et al.* 2000; LAW *et al.* 2003; CHOI AND WEIS 2011), we considered the  
104 possibility that additional proteins could be required. We focused on non-muscle myosins,  
105 because they are obvious motor proteins working on actin. Non-muscle myosins are hetero-  
106 hexamers consisting of two myosin heavy chains, two regulatory light chains (MLC-4 in *C.*  
107 *elegans*), which must be phosphorylated to enable motor activity, and two essential light chains  
108 (MLC-5 in *C. elegans*) (Vicente-Manzanares *et al.*, 2009). Importantly, several of those  
109 hexamers can assemble in a multi-subunit complex of opposite polarity through the C-terminal  
110 coiled-coil of the heavy chain. *C. elegans* has two non-muscle heavy chains, NMY-1 and NMY-  
111 2. NMY-1 is expressed at the time of elongation, is partially required for elongation and is  
112 essential for fertility (PIEKNY *et al.* 2003; KOVACEVIC *et al.* 2013). NMY-2 is expressed in  
113 early embryos, and is essential to establish early embryonic polarity and for cytokinesis (GUO  
114 AND KEMPHUES 1996; SHELTON *et al.* 1999; MUNRO *et al.* 2004; LIU *et al.* 2010). Both isoforms  
115 appear to act redundantly in embryonic morphogenesis, although the precise stage at which  
116 they are acting together has not been determined due to the genetic tools used at the time  
117 (PIEKNY *et al.* 2003).

118 To define more precisely how the two heavy chains act, we used temperature sensitive mutants  
119 to inactivate NMY-1/-2 at different stages. In addition, we combined them with other players  
120 involved in actin dynamics downstream of the muscle-induced actin severing. Our data  
121 establish that NMY-1 and NMY-2 are jointly required once muscles become active. We discuss  
122 their role compared to spectrins.

123

124

## 125 **MATERIALS AND METHODS**

### 126 **Strains and genetic methods**

127 The *C. elegans* control strain N2 and other strains were maintained under standard conditions  
128 (Brenner 1974), and were propagated at 20°C unless noted otherwise. A complete list of strains  
129 and associated genotypes used in this study are included in Table S1.

130

### 131 **Generation of a *nmy-1* thermosensitive allele**

132 We introduced a mutation in *nmy-1* by CRISPR (Clustered Regularly Interspaced Short  
133 Palindromic Repeats) at the position corresponding to the allele *nmy-2(ne3409ts)* affecting  
134 changing Leucine-981 to Proline. The corresponding leucine is conserved among non-muscle  
135 myosins (see Fig. S1). It was generated using an oligonucleotide repair template  
136 (GAAACCGTCCGTGATCTCGAGGAGCAACTCGAGCAAGA<sub>t</sub>GAACAAGCTAGACAG  
137 AA<sub>ACTGCTTcc</sub>GGATAAGACGAATGTTGACCAGAGACTTCGAAACCTGGAAGAGC  
138 G) carrying two mutations, one to create a non-functional PAM (protospacer adjacent motif)  
139 site (AGG to ATG), and one to introduce the desired mutation (TTG to CCG). We co-injected  
140 the plasmid encoding Cas9 (CRISPR-associated endonuclease 9) and the sgRNA (single-  
141 molecule guide RNA) for *nmy-1* (5'GAGGAGCAACTCGAGCAAG) at 50 ng/μl, the *nmy-1*  
142 oligonucleotide repair template at 20 ng/μl, along with the plasmids pRF4 and pBSK2 each at  
143 100 ng/μl in the strain ML2540 (10.7554/eLife.23866) carrying a CRISPR-generated NMY-  
144 1::GFP fusion, so as to track the putative mutant protein. We subsequently picked 88 Roller  
145 animals and screened by PCR for the presence of the mutation using the primers  
146 5'TCAAGCTCACCGCTTTAATTATGAAC and 5'CCATTTTCTCGGCCAAGTGATCT  
147 to find one positive hit that could be recovered, which we named *nmy-1(mc90ts)*. The allele  
148 *nmy-1(mc90ts)* had two mutations, as verified by sequencing the *nmy-1* locus from homozygous

149 animals, one corresponding to the desired L>P change and one corresponding to the PAM  
150 mutation, such that the protein sequence 959-QEEQARQKLLL became 959-  
151 QDEQARQKLLP. Homozygous *nmy-1(mc90ts)* animals were sterile at 25°C but not at 15°C  
152 (see results). We assume that thermosensitivity was due to the Leu to Pro change rather than to  
153 the upstream synonymous Glu to Asp change at the PAM site in the repair template.

154

### 155 **RNA interference (RNAi)**

156 RNAi experiments were performed by feeding on *HT115 Escherichia coli* bacteria strains  
157 generating double-stranded RNA (dsRNA) from the Ahringer-MRC feeding RNA interference  
158 (RNAi) library (Kamath et al., 2003). RNAi feeding was performed using standard procedures,  
159 with 100 µg ml<sup>-1</sup> ampicillin/1 mM IPTG (Sigma). Empty L4440 RNAi vector served as a  
160 control.

161

### 162 **Hatch count and arrest count protocols**

163 Strains carrying a thermosensitive mutation were stored at 15°C on agar plates. Embryos at  
164 different developmental stages on the plates were removed with an eyelash tool, washed in M9,  
165 and put on a 5% agarose pad with M9 on a slide sealed in paraffin oil. The slide was then  
166 imaged using a Roper Scientific spinning disk system with an immersion oil 40x objective  
167 (Zeiss Axio Observer Z1 microscope, Yokogawa CSUX1-A1 spinning disk confocal head,  
168 Photometrics Evolve 512 EMCCD camera, Metamorph software). Images were initially taken  
169 at 20°C until the incubation chamber attached to the microscope was set to 25°C, and imaging  
170 was continued overnight (8 hrs). A count was then performed to determine how many embryos  
171 of a particular initial developmental stage could make it to hatching, and at what stage they had  
172 arrested, if so.

173

## 174 **Fluorescence microscopy**

175 Spinning disk fluorescence imaging was performed with a 63× or 100× oil-immersion  
176 objective, NA=1.4. The temperature of the microscopy room was maintained at 20°C. Images  
177 of embryos were acquired using time-lapse mode with a 110 ms exposure at intervals depending  
178 on the experiment. Laser power and exposure times were kept constant throughout the  
179 experiments for specific strains and their controls. Images of Fig. 1F were acquired with a LSM  
180 980 Airyscan2 Zeiss confocal system equipped with 488 nm and 561 nm excitation laser lines  
181 and an oil immersion objective with NA=1.4. We performed a simultaneous acquisition for the  
182 green and red channels in order to get both stainings in the same time in confocal mode. The  
183 images were deconvolved with the Huygens software.

184

185

## 186 **Image processing and quantification**

187 All images were treated by first subtracting the background with a rolling ball radius of 50  
188 pixel. Any stacks were projected using maximum intensity. In Fig. 4, the average displacement  
189 was obtained by tracking stable points of high intensity in the epidermis and calculating the  
190 displacement using the following equation:

$$191 \quad d = \sqrt{(x_{i+1} - x_i)^2 + (y_{i+1} - y_i)^2}.$$

192 The images in Fig. 4 were three-plane projections from stacks taken with an inter-plane distance  
193 of 0.8 μm to capture the epidermis. The distribution of the signal was obtained by measuring  
194 the mean intensity and standard deviation of a square of 45X33 pixels inside the H<sub>1</sub> cell of the  
195 lateral epidermis, distribution =  $\sigma / \langle I \rangle$ . Images with an even distribution of signal (meaning no  
196 bright spots) have a low standard deviation  $\sigma$ , and therefore a low distribution. In the case of  
197 bright spots against a black background, the value of  $\sigma$  increases, and therefore so will the  
198 distribution.





## 200 **RESULTS and DISCUSSION**

201

### 202 **The concentration of non-muscle myosins increases until the 2-fold stage**

203 To better understand when non-muscle myosins are required during elongation, we examined  
204 the fluorescence of three CRISPR knockin strains marking the essential light chain MLC-5,  
205 NMY-2 and NMY-1. We imaged randomly picked MLC-5::GFP embryos and examined both  
206 their stage and the GFP fluorescence level. We observed that the fluorescence increased  
207 between the one- and 2-fold stages, and was followed by a slight plateau in the lateral cells, and  
208 a mostly steady value in the DV cells (Fig. 1B-C). Using an NMY-2::mKate; NMY-1::GFP  
209 double knockin strain, we observed that only NMY-2 started to decline after the beginning of  
210 lima bean stage, whereas NMY-1 increased after that stage (Fig. 1D-E). At higher  
211 magnification, we observed that NMY-2 was faint with no clear pattern in the lateral cells but  
212 formed aligned puncta in DV cells, whereas NMY-1 was enriched in the lateral epidermis cells  
213 as aligned puncta and colocalized in DV epidermal cells with NMY-2 puncta (Fig. 1F). These  
214 results indicate that the myosin population is not static. Furthermore, they are compatible with  
215 the possibility that the two non-muscle myosin motors could be acting redundantly with one  
216 another during late elongation.

217

### 218 **Inhibition of NMY-1 and NMY-2 arrests late elongation**

219 To test the functions of the two non-muscle myosin heavy chains, we used conditional alleles.  
220 A temperature sensitive *nmy-2* allele had previously been described, *nmy-2(ne3409ts)*, which  
221 changes a conserved Leucine residue among heavy chains into a Proline, NMY-2(L981P) (LIU  
222 *et al.* 2010). We engineered an NMY-1(L970P) change by CRISPR at the position homologous  
223 to that of *nmy-2(ne3409)*; the strategy also involved a change of E960 into D (see Methods and  
224 Fig. S1). The resulting allele, named *nmy-1(mc90ts)*, induced a thermosensitive sterile

225 phenotype but very little lethality (Table 1; Fig. 2A,2B-line 4). We assume that the sterility was  
226 due to the L970P mutation rather than to the synonymous E960D change, because the *nmy-*  
227 *2(ne3409ts)* at the homologous position is conditional, but cannot exclude additive effects of  
228 both changes. At the non-permissive temperature, the allele *nmy-1(mc90ts)* behaved like the  
229 previously known *nmy-1* missense allele *sb113*, which induced <10% lethality and partial  
230 sterility, but was not as severe as the presumptive null allele *sb115*, which induced over 50%  
231 embryonic and larval lethality (PIEKNY *et al.* 2003). Since the mutant protein NMY-2(*ne3409ts*)  
232 unfolds and becomes very rapidly inactive when animals are shifted to 25°C (LIU *et al.* 2010),  
233 we expected the mutant protein NMY-1(*mc90ts*) to behave likewise upon a temperature shift.

234 Using these two conditional alleles, we investigated at which stage they are required during  
235 elongation by raising mutant embryos at 20°C and then shifting them to the non-permissive  
236 temperature (Fig. 2A). Homozygous *nmy-2(ne3409ts)* embryos displayed embryonic lethality  
237 when shifted at an early elongation stage, however they could elongate if shifted at or beyond  
238 the 2-fold stage (Fig. 2B-line8). By contrast, double *nmy-2(ne3409ts); nmy-1(mc90ts)* mutants  
239 displayed 100% embryonic lethality irrespective of the time at which they were shifted to 25°C  
240 (Fig. 2B-line10), but could in general hatch if maintained at 20°C (Fig. 2B-line9).

241 We further examined at which elongation stage non-muscle myosin mutants arrested. When  
242 *nmy-2(ne3409ts)* embryos were shifted to 25°C at the pre-comma stage, about 40% remained  
243 pre-comma and 40% made it to the comma stage (Fig. 2D). When shifted at the comma stage,  
244 50% *nmy-2(ne3409ts)* progressed to the 2-fold stage. When double *nmy-2(ne3409ts); nmy-*  
245 *1(mc90ts)* mutants were shifted to 25°C, they immediately stopped elongation at the stage at  
246 which the temperature had been raised (Fig. 2C-D). Importantly, they did not regress to an  
247 earlier body morphology as we had observed in *spc-1 pak-1* or *fhod-1; spc-1* double mutants  
248 (Fig. 2C). These results show that NMY-2 is required during elongation, but not when muscles  
249 become required. Moreover, we conclude that NMY-1 and NMY-2 are continuously required

250 for elongation at all stages, that they act redundantly, but that they are not required to maintain  
251 body shape. These observations are also consistent with the notion that both non-myosin mutant  
252 proteins become very rapidly inactive at 25°C. The arrest phenotype observed upon an early  
253 elongation shift resembles that observed in strong *let-502*, *mlc-4* or *mlc-5* deficient embryos, as  
254 had previously been reported (PIEKNY *et al.* 2003). However, in contrast to the arrest phenotype  
255 observed when *nmy-2(ne3409ts)*; *nmy-1(mc90ts)* are shifted to 25°C at the 2-fold stage, *let-*  
256 *502(sb92ts)* embryos shifted to 25°C at the 2-fold stage did not arrest during elongation  
257 (DIOGON *et al.* 2007). One possibility could be that another kinase such as PAK-1 or MRCK-1  
258 acts in parallel to LET-502/Rho-kinase to phosphorylate MLC-4/RMLC at that stage (GALLY  
259 *et al.* 2009).

260 Our results confirm and much extend an earlier study suggesting that the two non-muscle  
261 myosins NMY-1 and NMY-2 are redundantly required during embryonic elongation (PIEKNY  
262 *et al.* 2003). Those previous experiments involved RNA interference against *nmy-2* in the  
263 background of the non-conditional and putative null alleles *nmy-1(sb113)* or *nmy-1(sb115)*. As  
264 RNAi against *nmy-2* had to be mild to allow cytokinesis, it did not enable the authors to define  
265 when NMY-1 and NMY-2 act during elongation. Our results establish that neither NMY-1 nor  
266 NMY-2 alone is required, but that they are constantly and redundantly required during late  
267 embryonic elongation, which depends on muscle input. Moreover, we conclude that NMY-2  
268 has a more critical role during early elongation since all single *nmy-2* mutants, but only a few  
269 single *nmy-1* mutants, arrested when shifted to 25°C during early elongation. Consistent with  
270 these results, NMY-1, NMY-2, and the myosin essential light chain MLC-5 are expressed in  
271 the epidermis throughout elongation.

272

273 **Elongation of *nmy-2 (ne3409ts)*; *nmy-1(mc90ts)* resumes after arrest**

274 As reported above, the double *nmy-2 (ne3409ts); nmy-1(mc90ts)* mutant always arrested during  
275 elongation, regardless of the initial stage of the embryos at the time of the temperature upshift.  
276 Nevertheless, these embryos could maintain normal muscle activity for several hours after the  
277 temperature shift. We thus wondered whether elongation could resume after an arrest. To test  
278 this possibility, we shifted *nmy-2 (ne3409ts); nmy-1(mc90ts)* embryos at 25°C for 45 min, using  
279 the incubator on the microscope to control the temperature, then then back to 15°C for 5hrs in  
280 a different incubator before imaging. As described in Fig. 3A, 60% of 2-fold *nmy-2 (ne3409ts);*  
281 *nmy-1(mc90ts)* embryos were able to hatch, as compared to 0% when left at 25°C. The  
282 resumption of elongation after arrest suggests that the temporary absence of NMY-1 and NMY-  
283 2 did not permanently damage any of the molecular-level components involved in this  
284 developmental stage. Finally, we investigated for how long could elongation be paused and  
285 then successfully restarted. To test this, we progressively increased the duration of the pause  
286 and found that the curve was sigmoidal, with a mid-height value of about 2,5 hours, and that it  
287 levelled off around 5 hours (Fig. 3B).

288

### 289 ***nmy-2 (ne3409ts); nmy-1(mc90ts)* has normal muscle activity at 25°C**

290 We considered two explanations to account for the fact that *nmy-2(ne3409ts); nmy-1(mc90ts)*  
291 embryos stop elongation when shifted to 25°C at the 2-fold stage. One possibility would be that  
292 these non-muscle myosins are required in muscles, for instance that in their absence muscles  
293 do not contract strongly enough or do not transmit properly the contractions to initiate actin  
294 filament bending and fail to trigger their reorganisation. Another possibility would be that they  
295 act in the epidermis to help reorganise actin filaments.

296 To test these options, we examined whether *nmy-2(ne3409ts); nmy-1(mc90ts)* embryos twitch  
297 normally, taking advantage of the fact that the *nmy-1(mc90ts)* allele is marked by GFP.

298 Specifically, we used irregularities in the NMY-1::GFP pattern to monitor the twitching pattern  
299 of control *nmy-1::gfp* embryos, of embryos in which muscles had been made inactive by RNAi  
300 treatment against *unc-112* which is essential to assemble myofilaments (ROGALSKI *et al.* 2000),  
301 and of *nmy-2(ne3409ts); nmy-1(mc90ts)* double mutants.

302 Analysis of NMY-1::GFP videograms showed that embryonic movements can be decomposed  
303 into two fundamental movements: rotation and twitching. The first was to follow the rotations  
304 of the cylindrical body within the eggshell of 90°, which is triggered by muscle activity (YANG  
305 2017). The second was measured by tracking landmarks in the lateral epidermal cells in-  
306 between body rotations (Fig. 4A, lower panels). We found that both control and double non-  
307 muscle myosin mutants at 25°C could rotate on average every 12 seconds (Fig. 4A-B upper  
308 panels; Fig. 4D), and contract locally over  $0.73 \pm 0.06 \mu\text{m}/\text{sec}$ , as compared to the control *nmy-*  
309 *1::gfp*,  $0.81 \pm 0.06 \mu\text{m}/\text{sec}$  when placed at 25°C (Fig. 4E). By contrast the muscle deficient  
310 strain exhibited no rotations and contracted  $0.21 \pm 0.01 \mu\text{m}/\text{sec}$  (Fig. 4C-E). We conclude that  
311 the double mutant is not lacking the mechanical input from the muscles needed to drive  
312 elongation. Furthermore, because we measured the behaviour of the epidermis, the muscles are  
313 also properly transmitting forces to the neighbouring tissue.

314 The results described above thus suggest that both non-muscle myosins are required in the  
315 epidermis. Which function could non-muscle myosins perform in the epidermis? As recalled  
316 above (see introduction), we previously suggested based on genetic and imaging data that the  
317 repeated muscle contractions induce the severing and shortening of circumferential actin  
318 filaments (LARDENNOIS *et al.* 2019). We could not at the time define what happens with severed  
319 actin ends. One possibility is that the hydrostatic pressure building up during elongation could  
320 be expected to pull them apart. Although spectrin may keep actin filaments together, since  
321 spectrins are considered as springs and  $\beta$ -spectrin can bind actin (LENNE *et al.* 2000; LAW *et al.*

322 2003; CHOI AND WEIS 2011), our data posit non-muscle myosins as perfect candidates to keep  
323 actin ends together.

324 Non-muscle myosins have two well-characterized activities, actin binding and actin pulling  
325 through their power stroke, which requires myosin regulatory light chain (MLC-4 in *C. elegans*)  
326 phosphorylation. We considered the possibility that muscle contractions could locally activate  
327 MLC-4 and attempted to test this idea by examining a wild-type MLC-4::GFP marker in control  
328 embryos, but failed to record any obvious such event (data not shown). We did not directly test  
329 in which cells NMY-1 and NMY-2 are required. However, we note that when wild-type MLC-  
330 4 is expressed under a dorso-ventral epidermal promoter in *mlc-4* null mutant embryos, the  
331 embryos elongate up to the 2.5-fold but do not reach full elongation (GALLY *et al.* 2009),  
332 indicating that MLC-4 activity, and hence NMY-1/2 activity, is most likely also required in  
333 dorso-ventral cells. In part because the precise organization and polarity of actin filaments  
334 within dorso-ventral actin bundles is unknown (COSTA *et al.* 1997), we cannot currently  
335 determine whether non-muscle myosins are only required to maintain actin ends together or if  
336 they pull on severed actin filaments to bring them closer before FHOD-1 activity. If actin  
337 filaments all have the same polarity, it would tend to exclude a pulling function, since pulling  
338 of actin filaments by non-muscle myosin relies on filaments of opposite polarity. One strategy  
339 to discriminate between both models would be to introduce a secondary mutation in NMY-1  
340 preventing ATP binding (OSORIO *et al.* 2019), which is beyond the scope of this study.

341

### 342 **Inactivated NMY-1 forms aggregates**

343 During the course of the experiments described above, we noticed that the NMY-  
344 1(mc90ts)::GFP protein aggregated in the epidermis at the non-permissive temperature (Fig.  
345 5A). The distribution of these aggregates was quantified in the lateral cells (see Methods),

346 whereby a large value of the ratio between the standard deviation  $\sigma$  over the mean intensity  
347 ( $\langle I \rangle$ ) indicated a less uniform distribution. Using this approach, we measured a value of  $0.5 \pm$   
348  $0.1$  at  $25^\circ\text{C}$  for control NMY-1::GFP embryos, the most uniform distribution of all the strains.  
349 It is noteworthy, that the NMY-1(*mc90ts*) displayed some degree of aggregation even at  $20^\circ\text{C}$   
350 as compared to control NMY-1::GFP (see Fig. 5A). At  $25^\circ\text{C}$ , we observed a marked  
351 aggregation for the single mutant *nmy-1(mc90ts)* ( $1.4 \pm 0.1$ ) as well as for the double mutant  
352 *nmy-2(ne3409ts); nmy-1(mc90ts)* ( $1.5 \pm 0.1$ ) (Fig. 5A-B). Interestingly, oxygen depletion,  
353 which has a marked effect on the regulatory light chain MLC-4 distribution (GALLY *et al.* 2009),  
354 did not modify that of wild-type NMY-1::GFP. It implies that the aggregation of NMY-  
355 1(*mc90ts*) does not result from ATP-depletion, consistent with the fact that the *mc90* mutation  
356 is located in the coiled coil region of NMY-1 (Fig. S1).

357  
358 We also investigated the long-term fate of these aggregates and found that after the initial  
359 inactivation, the many small clusters began to fuse for roughly 1.5 hours, until a sudden  
360 transition occurred within 3 minutes. At that point, the aggregates disappeared in a highly  
361 coordinated fashion. Note that the images used for the quantification of the distribution of the  
362 aggregates were taken on average one hour after the temperature shift had occurred, and thus  
363 correspond to roughly the half-point in the time-evolution of the particles. Our findings are  
364 consistent with the literature, indicating that non-functional non-muscle myosins in both *C.*  
365 *elegans* oocytes, and human thrombocytes tend to aggregate (ALTHAUS AND GREINACHER 2009;  
366 SUN *et al.* 2020).

## 367 368 **Conclusion**

369 Altogether, our data identify the presence of both NMY-1 and NMY-2 in the epidermis during  
370 late elongation. We found that either NMY-1 or NMY-2 can support late elongation but that if



371 both are absent elongation beyond the 2-fold stage failed. Not only did their combined absence  
372 cause a hatching failure, but the arrest in development was immediate, which is also the case  
373 for earlier developmental stages in the embryo. Importantly, this arrest could not be attributed  
374 to less muscle movement, and thus to abnormal mechanotransduction in the epidermis. We  
375 found that the arrest could be reversed by returning the embryos to  $< 20^{\circ}\text{C}$ , indicating that the  
376 absence of both non-muscle myosin heavy chains did not permanently affect actin integrity, nor  
377 any other epidermal structure. Our data are compatible with the possibility that this myosin pair  
378 acts to reduce the length of the epidermal actin filaments by holding or pulling the severed ends  
379 together.

380

### 381 **Data Availability Statement**

382 Strains and plasmids are available upon request. The authors affirm that all data necessary for  
383 confirming the conclusions of the article are present within the article, figures, and tables.

384

### 385 **Acknowledgements**

386 The authors greatly acknowledge France Lam from the IBPS Imaging Facility for running the  
387 Zeiss Airyscan confocal microscope and for performing deconvolution of the images. The IBPS  
388 Imaging facility is supported by Region-Île-de-France, Sorbonne-University and CNRS. This  
389 work was supported by an Agence Nationale de la Recherche grant to Michel Labouesse  
390 (project number ANR-18-CE13-0008-01).

391

392 **LEGENDS**

393

394

395 **Figure 1. The two non-muscle myosins are present in the epidermis throughout**  
396 **morphogenesis**

397 **(A)** Cross-section through an embryo illustrating the main anatomical features of the embryo:

398 the dorsal and ventral epidermis (pink, red), the lateral epidermis (yellow) and the muscles

399 (orange); other tissues not represented for clarity. Muscles are attached to the apical

400 extracellular matrix (not illustrated) surrounding the embryo through hemidesmosomes in the

401 epidermis (blue dots). Actin filaments (green) run circumferentially as bundles. The current

402 model holds that in a typical contraction cycle, muscles will locally displace the actin filaments

403 (black arrows in 2<sup>nd</sup> drawing), which will trigger their severing (3<sup>rd</sup> drawing), before they

404 eventually get stabilized by a complex of actin-binding proteins (dark green stars). At the end

405 of the cycle, when the underlying muscles relax, the embryo has become thinner and longer (4<sup>th</sup>

406 drawing). It is unclear whether the actin-binding complex can hold actin ends to counter the

407 hydrostatic pressure (blue arrows in 3<sup>rd</sup> drawing) if they drift apart. **(B)** Fluorescence

408 micrographs showing the distribution of the essential myosin light chain MLC-5 (marked by a

409 GFP knockin) at three different stages: lima bean, 2-fold, 3-fold. Note that MLC-5 is enriched

410 in the lateral seam cells (yellow arrow). **(C)** Quantification of MLC-5::GFP fluorescence over

411 time in the lateral and dorso-ventral epidermis. **(D)** Fluorescence micrographs showing the

412 distribution of the two large non-muscle myosin chains NMY-1 (marked by a GFP knockin)

413 and NMY-2 (marked by a mCherry knockin) at different stages; timing starts approximately

414 125 minutes after the 1-cell stage (black line in E; see video1). **(E)** Quantification of NMY-

415 1::GFP and NMY-2::mKate fluorescence starting at the lima bean stage. Note the lack of a clear

416 myosin cable along cell contours in the 2-fold embryo (+300 min image). **(F)** Deconvoluted

417 confocal micrographs of NMY-1::GFP and NMY-2::mKate in the lateral seam (yellow box)

418 and dorso-ventral (pink box) epidermis of a 3-fold embryo. Higher magnification of the area

419 marked by a dotted rectangle are shown on the left for seam cells (three consecutive focal  
420 planes; 1.75x magnification), or in the top right corner for the dorso-ventral epidermis (4.5x  
421 magnification) revealing short circumferential alignments. Scale bars, 10  $\mu\text{m}$  (B, D, F), except  
422 4  $\mu\text{m}$  for the enlargements. Note that NMY-1 and NMY-2 form parallel bands, especially in  
423 the dorso-ventral epidermis, but outside the area located above muscles.

424

425 **Figure 2. NMY-1 and NMY-2 are required during the morphogenetic phase driven by**  
426 **muscles**

427 **(A)** Outline of the temperature shift experiments: embryos were maintained at 20°C and  
428 shifted to 25°C at different stages (prior to comma, comma, or two-fold). **(B)** Percentage of  
429 hatching when embryos were left at 20°C or shifted to 25°C at the stage indicated in the top  
430 row. **(C)** DIC images of *nmy-2(ne3409ts)*; *nmy-1(mc90ts)* left at 15°C (top row) or shifted to  
431 25°C (bottom row). Note that both lima bean and 1.8-fold embryos essentially did not  
432 elongate any further after the shift to 25°C at t0; scale bar 10  $\mu\text{m}$ . **(D)** Percentage and arrest  
433 stage of single *nmy-2(ne3409ts)*, *nmy-1(mc90ts)* and double mutants shifted to 25°C at the  
434 stage indicated on the X axis. Note that for the double mutant, all 2-fold embryos arrested at  
435 the 2-fold stage.

436

437 **Figure 3. Resumption of elongation.**

438 **(A)** Double *nmy-2(ne3409ts)*; *nmy-1(mc90ts)* mutants were shifted to 25°C at the stage  
439 indicated at the bottom and left overnight at 25°C (left three columns, taken from Fig. 2D) or  
440 left at 25°C for 1 hour, causing arrest, then shifted for 5 hours at 15°C (right three columns).  
441 Note that elongation could resume in many cases. **(B)** Quantification of the percentage of *nmy-*  
442 *2(ne3409ts)*; *nmy-1(mc90ts)* embryos that could resume elongation after being left at 25°C for

443 various duration and then shifted back to 15°C (N>500). The polynomial fit probability is  
444 0.9903.

445

446 **Figure 4. Depletion of NMY-1 and NMY-2 does not affect muscle contractions**

447 **(A)** Spinning disk micrographs from Video2 illustrating a rotation (top two images; see  
448 yellow arrow) or local contractions (bottom four images) in *nmy-1[mc82(nmy-1::gfp)]*  
449 knockin embryos grown at 25°C; timing refers to the video. Note in the bottom four images  
450 the local magnitude of contraction between two brighter NMY-1::GFP points (yellow  
451 brackets with their size above). **(B)** Spinning disk micrographs from Video3 illustrating a  
452 rotation (top two images; see yellow arrow) or local contractions in double *nmy-2(ne3409ts);*  
453 *nmy-1(mc90ts)::gfp* shifted to 25°C when they reached the 2-fold stage; timing refers to the  
454 video. Note the local contractions (yellow brackets with their size above). **(C)** Spinning disk  
455 micrographs from Video4 the local contractions in a *nmy-1[mc82(nmy-1::gfp)]* embryo  
456 treated by RNAi against the gene *unc-112* and raised at 25°C; timing refers to the video. Note  
457 the local contractions (yellow brackets with their size above). **(D)** Quantification of the time  
458 elapsed between embryo rotations, defined as at least 90° about the centre line of the embryo,  
459 as observed in videos similar to those shown in (A-C); *unc-112(RNAi)* failed to rotate. **(E)**  
460 Quantification of bright NMY-1::GFP particles lateral movements consecutive to muscle  
461 twitching measured from videos such as those in (A-C). The number of embryos was at least  
462 18 for each genotype in all quantifications.

463

464 **Figure 5. NMY-1(mc90ts)::GFP spots aggregate at the non-permissive temperature**

465 **(A)** Spinning disk micrographs illustrating NMY-1::GFP particles in different genotypes  
466 when embryos were raised at 20°C, shifted to 25°C after reaching the 2-fold stage, or grown  
467 at 25°C in anaerobic conditions. Enlargements (1.75x) of the boxed areas are shown in the

468 bottom right corner. **(B)** Spinning disk micrographs illustrating the further aggregation of  
469 NMY-1(*mc90ts*)::GFP particles, until their rapid dissolution; images taken from Video6. **(C)**  
470 Quantification of the distribution of NMY-1::GFP particles brightness measured in the H1  
471 seam cell and expressed as standard deviation of the signal divided by the mean. The number  
472 of embryos was at least 25 for each genotype.

473

474

475

#### 476 **Supplementary figures**

##### 477 **Supplementary figure 1. Sequence alignment of non-muscle heavy chains and positions** 478 **of the *nmy-1* and *nmy-2* conditional alleles**

479 Upper bar, schematized structure of a non-muscle heavy chain, indicating the position of the  
480 residue L981 which is mutated to a proline in *nmy-2(ne3409ts)*. Below, alignment of seven  
481 heavy chains starting in the IQ region. The residue altered in *nmy-2(ne3409ts)* (red arrow) is  
482 conserved and was also mutated in *nmy-1(mc90ts)* (green circle). Red asterisk, position of the  
483 secondary mutation introduced to mutate the PAM site (959-QEEQARQKLLL to 959-  
484 QDEQARQKLLL).

485

486

#### 487 **Supplementary videos**

488 **Video1:** Temporal distributions of a strain carrying NMY-2::mKate and NMY-1::GFP  
489 knockins (strain FBR241). The acquisition rate was 1 image every 15 minutes, and the  
490 playback speed is 6 frames per second.

491

492 **Video2:** Two-fold embryo of *nmy-1(mc82[nmy-1::gfp])* control strain. Acquisition rate, 1

493 frame per second; playback speed, 6 frames per second. Still images of Fig. 3A were taken  
494 from this video, with the timing indicated on each image corresponding to the real timing on  
495 this videogram.

496

497 **Video3:** Double *nmy-2(ne3409ts); nmy-1(mc90ts)::gfp* mutant embryo shifted to 25°C after  
498 2-fold stage. Acquisition rate, 1 frame per second; playback speed, 6 frames per second. Still  
499 images of Fig. 3B were taken from this video, with the timing indicated on each image  
500 corresponding to the real timing on this videogram.

501

502 **Video4:** A *unc-112(RNAi); nmy-1(mc82[nmy-1::gfp])* embryo beyond the 2-fold stage, which  
503 had been raised at 25°C. Acquisition rate, 1 frame per second; playback speed, 6 frames per  
504 second. Still images of Fig. 3D come from this video, with the timing indicated on each image  
505 corresponding to the real timing on this videogram.

506

507 **Video5:** A two-fold *nmy-1(mc90ts)::gfp* embryo raised at 25°C. Protein aggregates, embryo  
508 rotations and twitching, can be observed. Acquisition rate, 1 frame per second; playback  
509 speed, 6 frames, per second.

510

511 **Video6:** A 1.5-fold *nmy-2(ne3409ts); nmy-1(mc90ts)::gfp* embryo which had been shifted to  
512 25°C. Note the gradual fusion of the NMY-1::GFP aggregates in the epidermis over time.  
513 Acquisition rate, 1 frame per 1 minute; playback speed, 6 frames per second.

514

515

516 **BIBLIOGRAPHY**

517

- 518 Aigouy, B., R. Farhadifar, D. B. Staple, A. Sagner, J. C. Roper *et al.*, 2010 Cell flow reorients  
519 the axis of planar polarity in the wing epithelium of *Drosophila*. *Cell* 142: 773-  
520 786.
- 521 Althaus, K., and A. Greinacher, 2009 MYH9-related platelet disorders. *Semin Thromb*  
522 *Hemost* 35: 189-203.
- 523 Bonakdar, N., R. Gerum, M. Kuhn, M. Sporrer, A. Lippert *et al.*, 2016 Mechanical plasticity  
524 of cells. *Nat Mater* 15: 1090-1094.
- 525 Choi, H. J., and W. I. Weis, 2011 Crystal structure of a rigid four-spectrin-repeat fragment  
526 of the human desmoplakin plakin domain. *J Mol Biol* 409: 800-812.
- 527 Collinet, C., M. Rauzi, P. F. Lenne and T. Lecuit, 2015 Local and tissue-scale forces drive  
528 oriented junction growth during tissue extension. *Nat Cell Biol* 17: 1247-1258.
- 529 Costa, M., B. W. Draper and J. R. Priess, 1997 The role of actin filaments in patterning the  
530 *Caenorhabditis elegans* cuticle. *Dev Biol* 184: 373-384.
- 531 del Rio, A., R. Perez-Jimenez, R. Liu, P. Roca-Cusachs, J. M. Fernandez *et al.*, 2009  
532 Stretching single talin rod molecules activates vinculin binding. *Science* 323: 638-  
533 641.
- 534 Diogon, M., F. Wissler, S. Quintin, Y. Nagamatsu, S. Sookhareea *et al.*, 2007 The RhoGAP  
535 RGA-2 and LET-502/ROCK achieve a balance of actomyosin-dependent forces in  
536 *C. elegans* epidermis to control morphogenesis. *Development* 134: 2469-2479.
- 537 Doubrovinski, K., M. Swan, O. Polyakov and E. F. Wieschaus, 2017 Measurement of  
538 cortical elasticity in *Drosophila melanogaster* embryos using ferrofluids. *Proc*  
539 *Natl Acad Sci U S A* 114: 1051-1056.
- 540 Gally, C., F. Wissler, H. Zahreddine, S. Quintin, F. Landmann *et al.*, 2009 Myosin II  
541 regulation during *C. elegans* embryonic elongation: LET-502/ROCK, MRCK-1 and  
542 PAK-1, three kinases with different roles. *Development* 136: 3109-3119.
- 543 Gillard, G., O. Nicolle, T. Brugière, S. Prigent, M. Pinot *et al.*, 2019 Force Transmission  
544 between Three Tissues Controls Bipolar Planar Polarity Establishment and  
545 Morphogenesis. *Curr Biol* 29: 1360-1368.e1364.
- 546 Gilmour, D., M. Rembold and M. Leptin, 2017 From morphogen to morphogenesis and  
547 back. *Nature* 541: 311-320.
- 548 Goodwin, K., and C. M. Nelson, 2021 Mechanics of Development. *Dev Cell* 56: 240-250.
- 549 Guo, S., and K. J. Kemphues, 1996 A non-muscle myosin required for embryonic polarity  
550 in *Caenorhabditis elegans*. *Nature* 382: 455-458.
- 551 Hu, X., F. M. Margadant, M. Yao and M. P. Sheetz, 2017 Molecular stretching modulates  
552 mechanosensing pathways. *Protein Sci* 26: 1337-1351.
- 553 Khalilgharibi, N., J. Fouchard, N. Asadipour, R. Barrientos, M. Duda *et al.*, 2019 Stress  
554 relaxation in epithelial monolayers is controlled by the actomyosin cortex. *Nature*  
555 *Physics* 15: 839-+.
- 556 Kovacevic, I., J. M. Orozco and E. J. Cram, 2013 Filamin and phospholipase C- $\epsilon$  are  
557 required for calcium signaling in the *Caenorhabditis elegans* spermatheca. *PLoS*  
558 *Genet* 9: e1003510.
- 559 Lardennois, A., G. Pasti, T. Ferraro, F. Llense, P. Mahou *et al.*, 2019 An actin-based  
560 viscoplastic lock ensures progressive body-axis elongation. *Nature* 573: 266-270.
- 561 Law, R., P. Carl, S. Harper, P. Dalhaimer, D. W. Speicher *et al.*, 2003 Cooperativity in  
562 forced unfolding of tandem spectrin repeats. *Biophys J* 84: 533-544.
- 563 le Duc, Q., Q. Shi, I. Blonk, A. Sonnenberg, N. Wang *et al.*, 2010 Vinculin potentiates E-  
564 cadherin mechanosensing and is recruited to actin-anchored sites within  
565 adherens junctions in a myosin II-dependent manner. *J Cell Biol* 189: 1107-1115.

- 566 Lenne, P. F., A. J. Raae, S. M. Altmann, M. Saraste and J. K. Horber, 2000 States and  
567 transitions during forced unfolding of a single spectrin repeat. *FEBS Lett* 476:  
568 124-128.
- 569 Levayer, R., A. Pelissier-Monier and T. Lecuit, 2011 Spatial regulation of Dia and Myosin-  
570 II by RhoGEF2 controls initiation of E-cadherin endocytosis during epithelial  
571 morphogenesis. *Nature cell biology* 13: 529-540.
- 572 Liu, J., L. L. Maduzia, M. Shirayama and C. C. Mello, 2010 NMY-2 maintains cellular  
573 asymmetry and cell boundaries, and promotes a SRC-dependent asymmetric cell  
574 division. *Dev Biol* 339: 366-373.
- 575 Lye, C. M., G. B. Blanchard, H. W. Naylor, L. Muresan, J. Huisken *et al.*, 2015 Mechanical  
576 Coupling between Endoderm Invagination and Axis Extension in *Drosophila*.  
577 *PLoS Biol* 13: e1002292.
- 578 Maitre, J. L., R. Niwayama, H. Turlier, F. Nedelec and T. Hiiragi, 2015 Pulsatile cell-  
579 autonomous contractility drives compaction in the mouse embryo. *Nat Cell Biol*  
580 17: 849-855.
- 581 Martin, A. C., M. Kaschube and E. F. Wieschaus, 2009 Pulsed contractions of an actin-  
582 myosin network drive apical constriction. *Nature* 457: 495-499.
- 583 McCullough, B. R., E. E. Grintsevich, C. K. Chen, H. Kang, A. L. Hutchison *et al.*, 2011  
584 Cofilin-linked changes in actin filament flexibility promote severing. *Biophys J*  
585 101: 151-159.
- 586 Molnar, K., and M. Labouesse, 2021 The plastic cell: mechanical deformation of cells and  
587 tissues. *Open Biol* 11: 210006.
- 588 Moore, S. W., P. Roca-Cusachs and M. P. Sheetz, 2010 Stretchy proteins on stretchy  
589 substrates: the important elements of integrin-mediated rigidity sensing. *Dev Cell*  
590 19: 194-206.
- 591 Munro, E., J. Nance and J. R. Priess, 2004 Cortical flows powered by asymmetrical  
592 contraction transport PAR proteins to establish and maintain anterior-posterior  
593 polarity in the early *C. elegans* embryo. *Developmental cell* 7: 413-424.
- 594 Niethammer, P., 2021 Components and Mechanisms of Nuclear Mechanotransduction.  
595 *Annu Rev Cell Dev Biol* 37: 233-256.
- 596 Osorio, D. S., F. Y. Chan, J. Saramago, J. Leite, A. M. Silva *et al.*, 2019 Crosslinking activity  
597 of non-muscle myosin II is not sufficient for embryonic cytokinesis in *C. elegans*.  
598 *Development* 146.
- 599 Piekny, A. J., J. L. Johnson, G. D. Cham and P. E. Mains, 2003 The *Caenorhabditis elegans*  
600 nonmuscle myosin genes *nmy-1* and *nmy-2* function as redundant components of  
601 the *let-502*/Rho-binding kinase and *mel-11*/myosin phosphatase pathway during  
602 embryonic morphogenesis. *Development* 130: 5695-5704.
- 603 Rauzi, M., P. F. Lenne and T. Lecuit, 2010 Planar polarized actomyosin contractile flows  
604 control epithelial junction remodelling. *Nature* 468: 1110-1114.
- 605 Rogalski, T. M., G. P. Mullen, M. M. Gilbert, B. D. Williams and D. G. Moerman, 2000 The  
606 UNC-112 gene in *Caenorhabditis elegans* encodes a novel component of cell-  
607 matrix adhesion structures required for integrin localization in the muscle cell  
608 membrane. *The Journal of cell biology* 150: 253-264.
- 609 Shelton, C. A., J. C. Carter, G. C. Ellis and B. Bowerman, 1999 The nonmuscle myosin  
610 regulatory light chain gene *mlc-4* is required for cytokinesis, anterior-posterior  
611 polarity, and body morphology during *Caenorhabditis elegans* embryogenesis. *J*  
612 *Cell Biol* 146: 439-451.



- 613 Solon, J., A. Kaya-Copur, J. Colombelli and D. Brunner, 2009 Pulsed forces timed by a  
614 ratchet-like mechanism drive directed tissue movement during dorsal closure.  
615 Cell 137: 1331-1342.
- 616 Staddon, M. F., K. E. Cavanaugh, E. M. Munro, M. L. Gardel and S. Banerjee, 2019  
617 Mechanosensitive Junction Remodeling Promotes Robust Epithelial  
618 Morphogenesis. Biophys J 117: 1739-1750.
- 619 Sun, Y., M. Li, D. Zhao, X. Li, C. Yang *et al.*, 2020 Lysosome activity is modulated by  
620 multiple longevity pathways and is important for lifespan extension in *C. elegans*.  
621 Elife 9.
- 622 Vuong-Brender, T. T., M. Ben Amar, J. Pontabry and M. Labouesse, 2017 The interplay of  
623 stiffness and force anisotropies drives embryo elongation. Elife 6.
- 624 Williams, B. D., and R. H. Waterston, 1994 Genes critical for muscle development and  
625 function in *Caenorhabditis elegans* identified through lethal mutations. J Cell Biol  
626 124: 475-490.
- 627 Yang, X., 2017, pp. Université de Strasbourg, France, Strasbourg, France.
- 628 Yap, A. S., K. Duszyc and V. Viasnoff, 2018 Mechanosensing and Mechanotransduction at  
629 Cell-Cell Junctions. Cold Spring Harbor Perspectives in Biology 10.
- 630 Yonemura, S., Y. Wada, T. Watanabe, A. Nagafuchi and M. Shibata, 2010 alpha-Catenin as  
631 a tension transducer that induces adherens junction development. Nat Cell Biol  
632 12: 533-542.
- 633 Zhang, H., and M. Labouesse, 2010 The making of hemidesmosome structures in vivo.  
634 Developmental Dynamics 239: 1465-1476.
- 635 Zhang, H., F. Landmann, H. Zahreddine, D. Rodriguez, M. Koch *et al.*, 2011 A tension-  
636 induced mechanotransduction pathway promotes epithelial morphogenesis.  
637 Nature 471: 99-103.
- 638

639  
640  
641  
642  
643  
644  
645  
646  
647  
648  
649  
650  
651  
652  
653  
654  
655  
656  
657  
658  
659

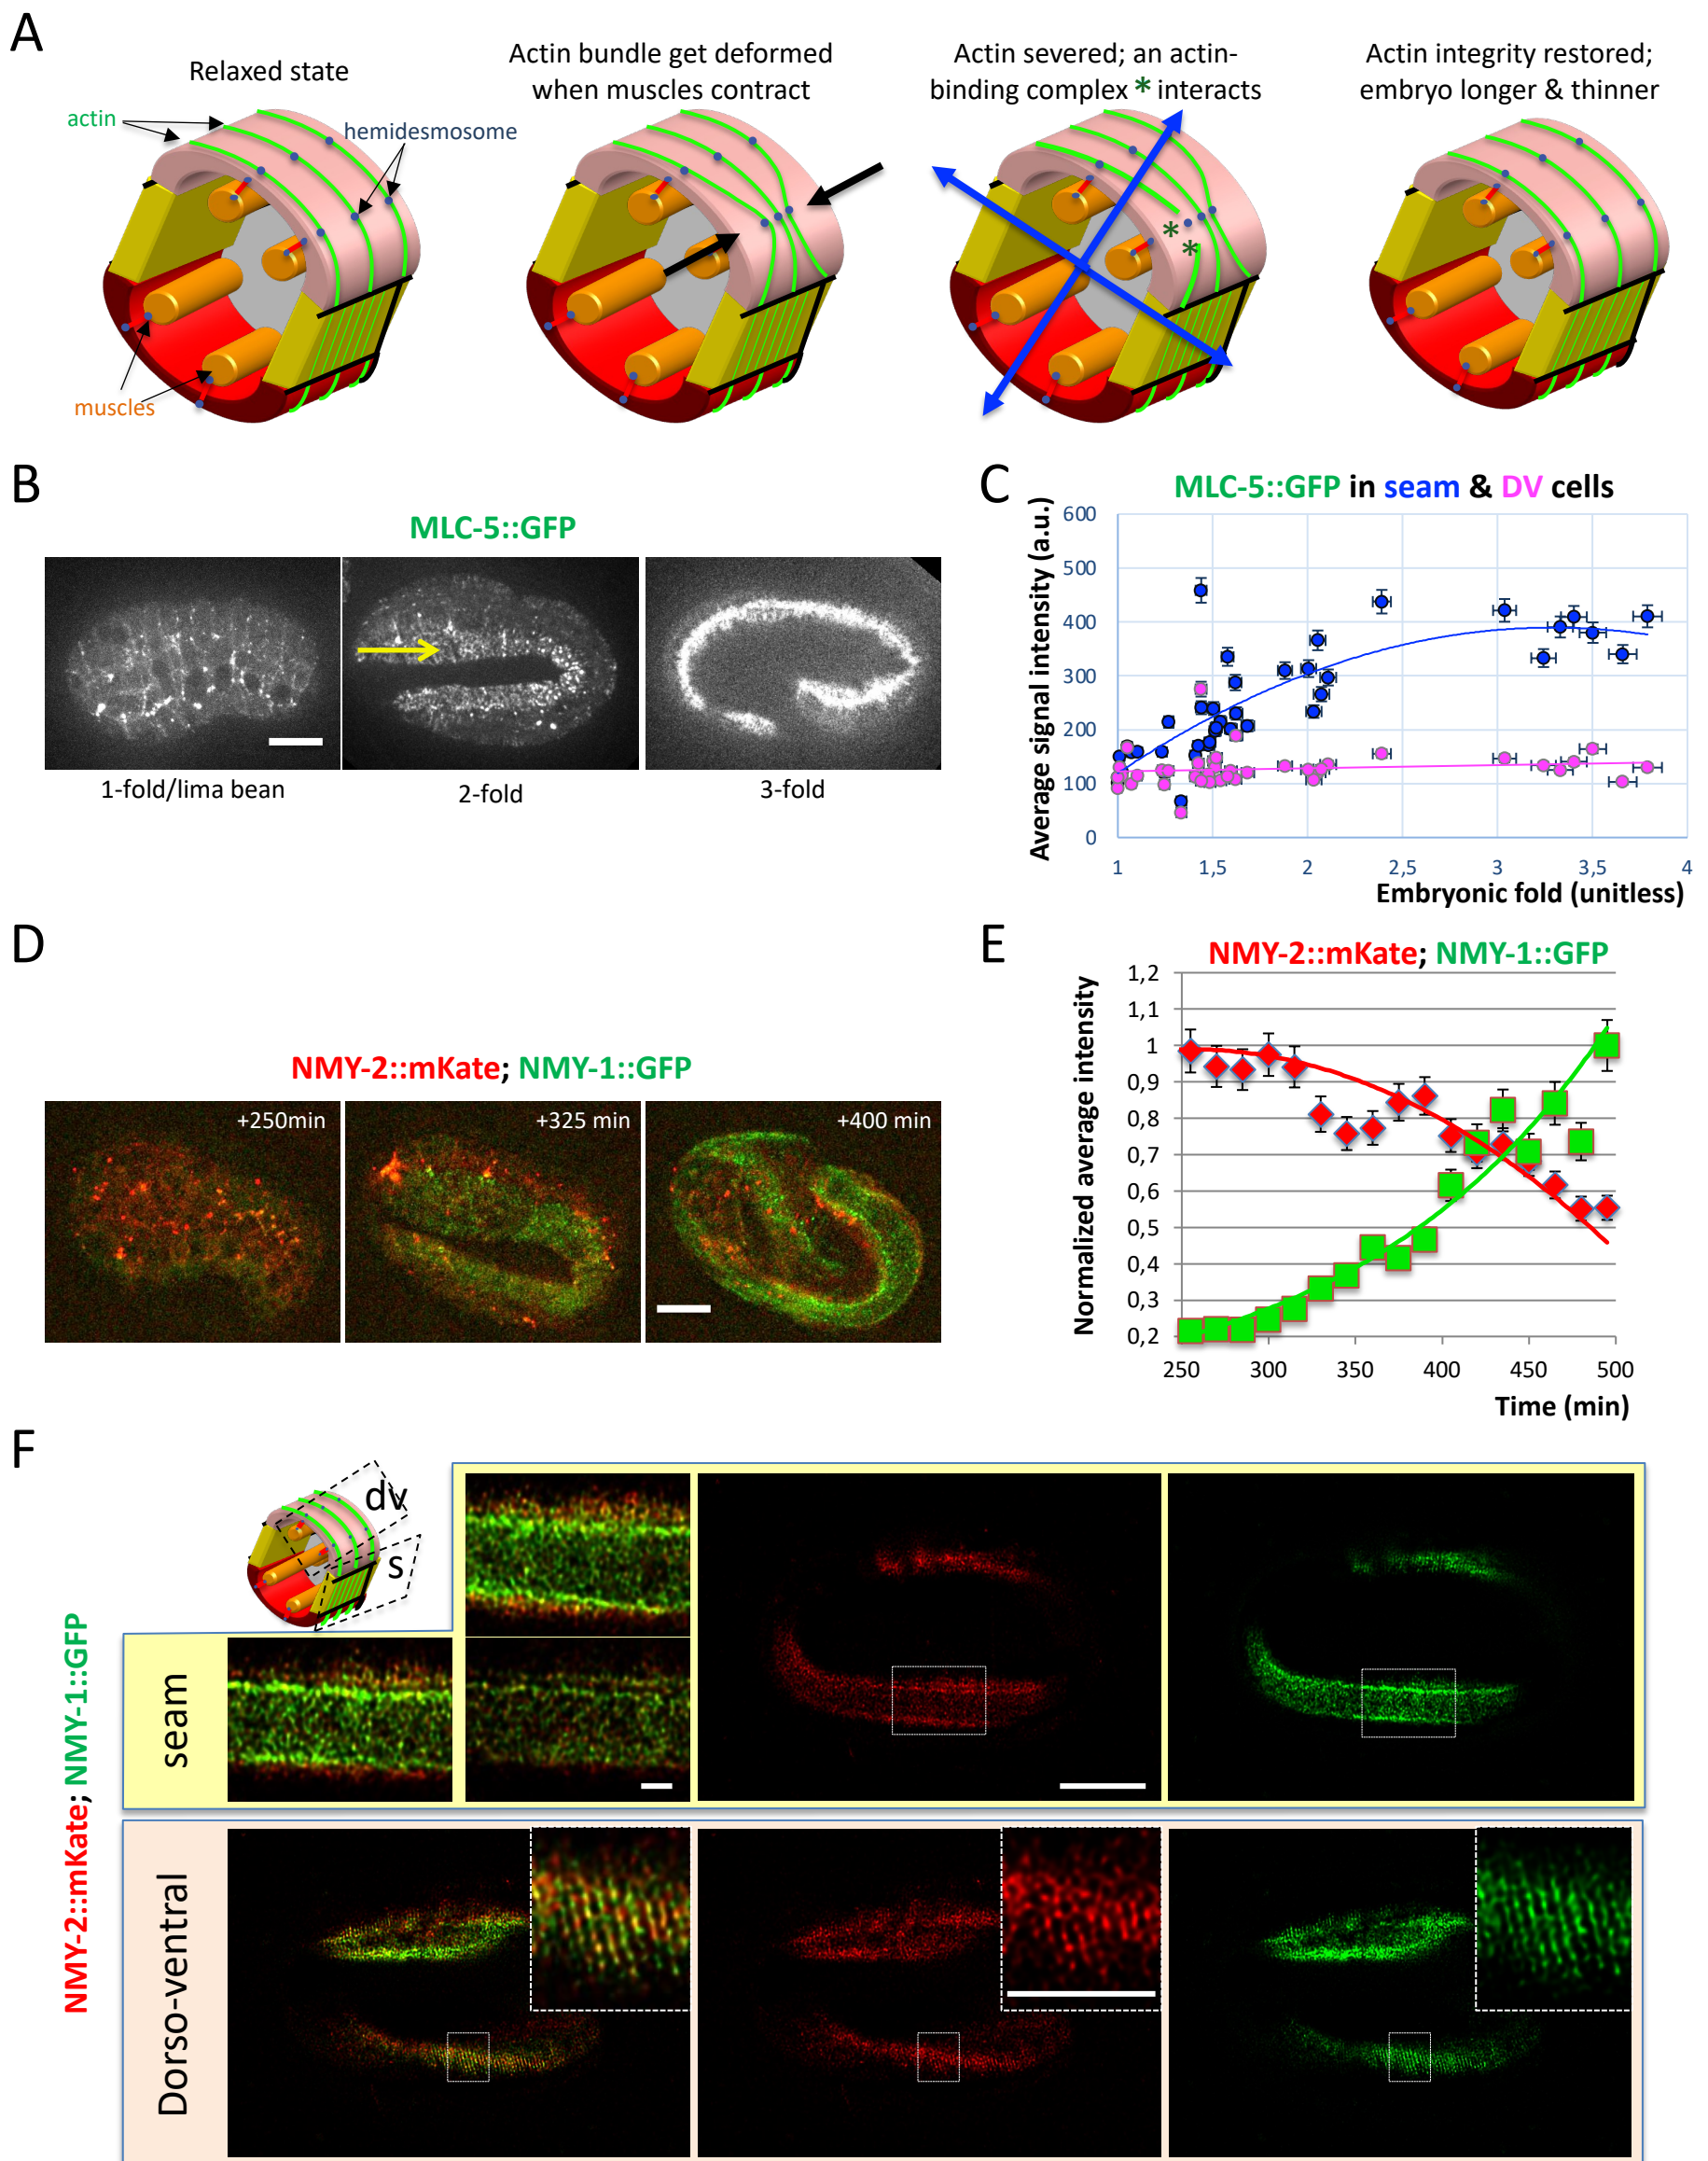

Figure 1

**A**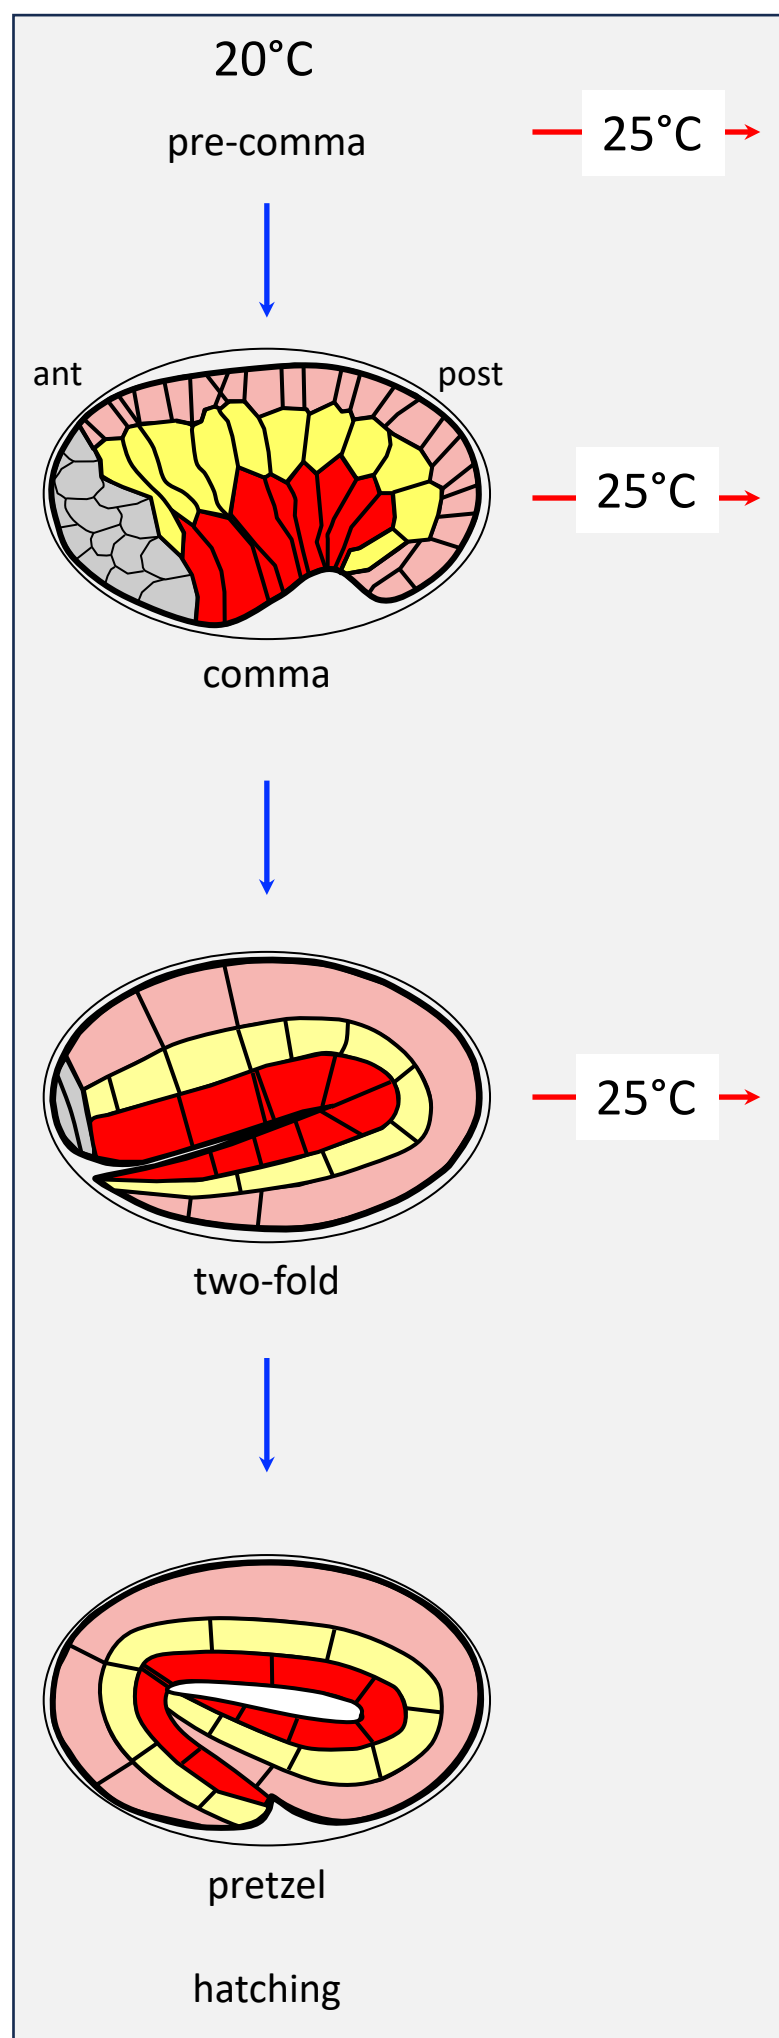**B**

| Line | Genotype                                   | Temp (Celsius) | N   | pre-comma (% elong.) | comma (% elong.) | 2F (%elong.) |
|------|--------------------------------------------|----------------|-----|----------------------|------------------|--------------|
| 1    | wild type                                  | 20             | 130 | 100                  | 95               | 100          |
| 2    | wild type                                  | 25             | 105 | 100                  | 100              | 100          |
| 3    | <i>nmy-1(mc90ts)::gfp</i>                  | 20             | 98  | 96                   | 100              | 100          |
| 4    | <i>nmy-1(mc90ts)::gfp</i>                  | 25             | 130 | 89                   | 96               | 100          |
| 5    | <i>nmy-1::gfp</i>                          | 20             | 115 | 100                  | 100              | 100          |
| 6    | <i>nmy-1::gfp</i>                          | 25             | 91  | 100                  | 100              | 100          |
| 7    | <i>nmy-2(ne3409ts)</i>                     | 20             | 150 | 89                   | 100              | 100          |
| 8    | <i>nmy-2(ne3409ts)</i>                     | 25             | 124 | 11                   | 46               | 100          |
| 9    | <i>nmy-2(ne3409ts); nmy-1(mc90ts)::gfp</i> | 20             | 155 | 70                   | 85               | 100          |
| 10   | <i>nmy-2(ne3409ts); nmy-1(mc90ts)::gfp</i> | 25             | 130 | 0                    | 0                | 0            |

0-35% hatch

36-65% hatch

66-100% hatch

**C**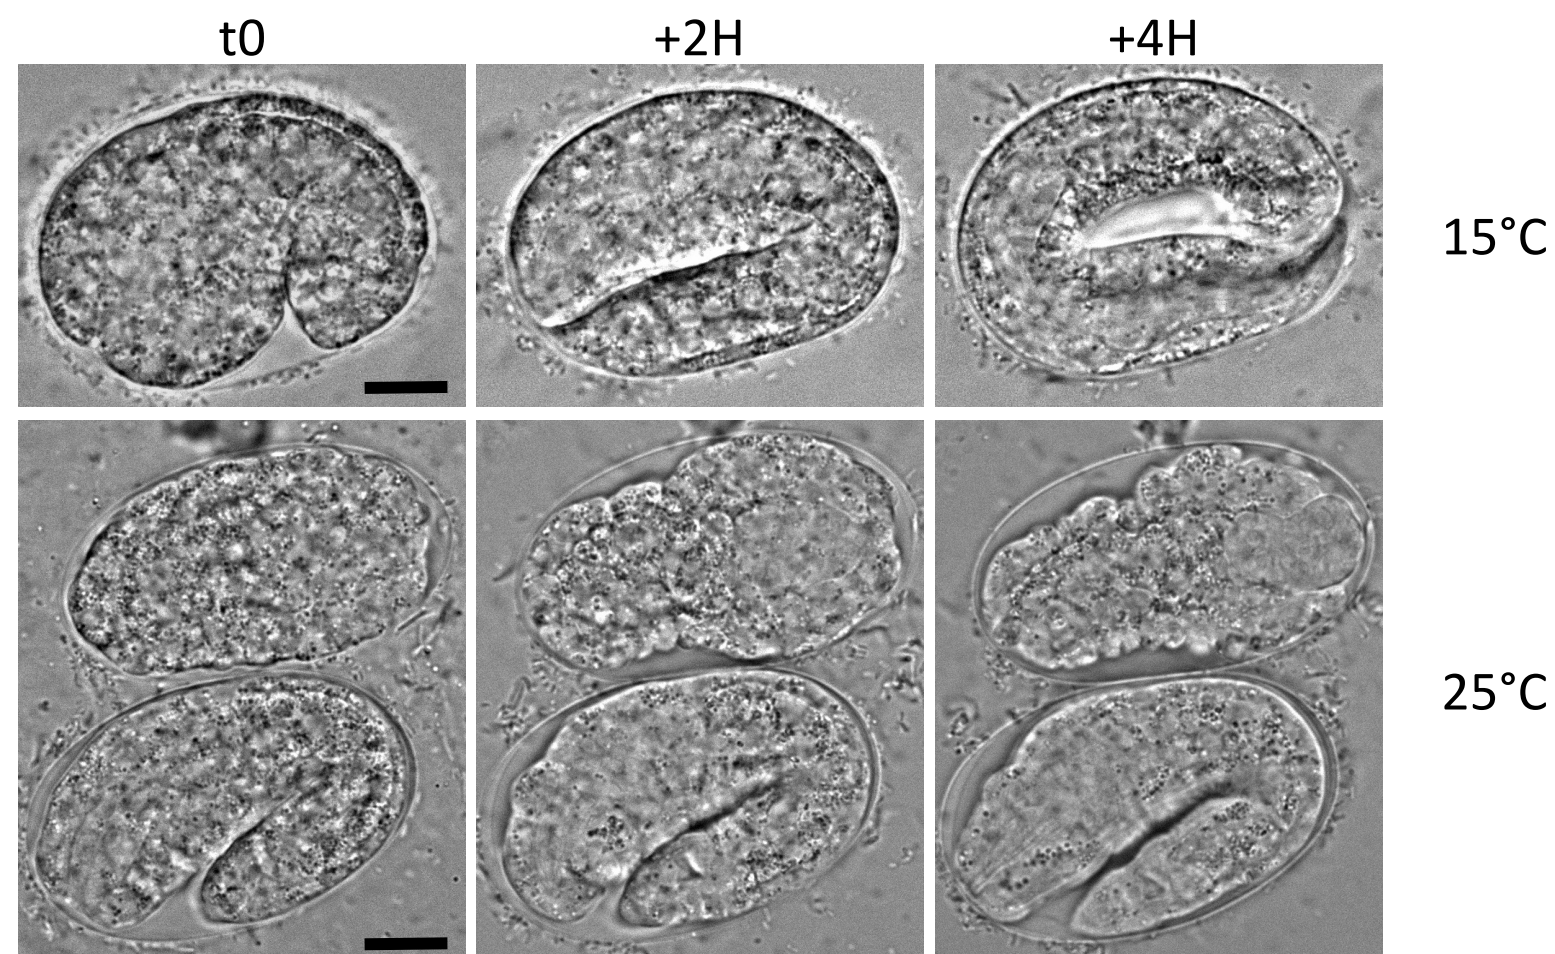**D**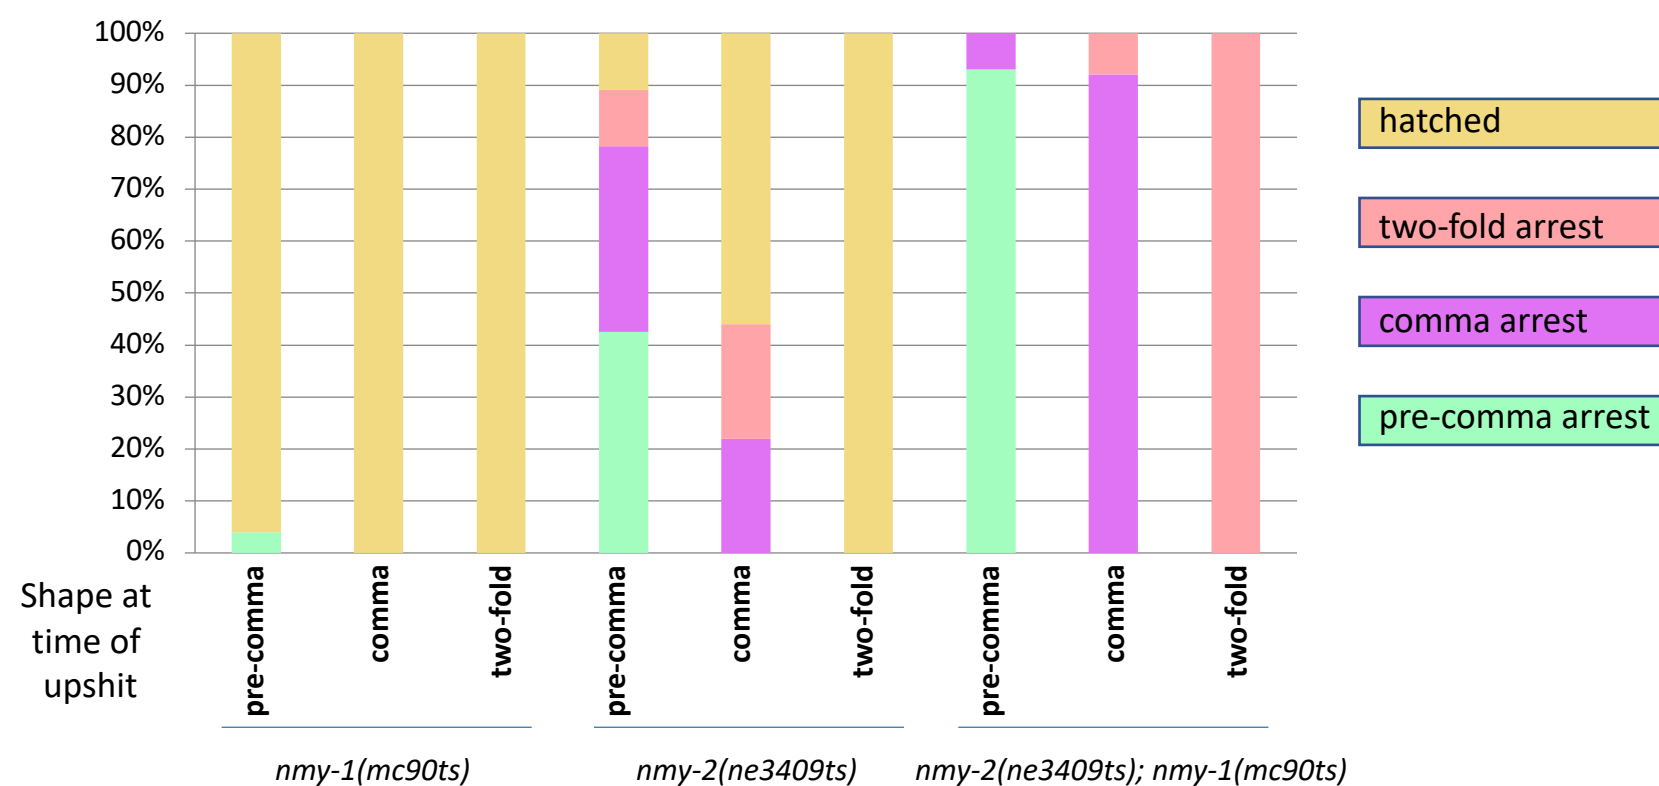**Figure 2**

A

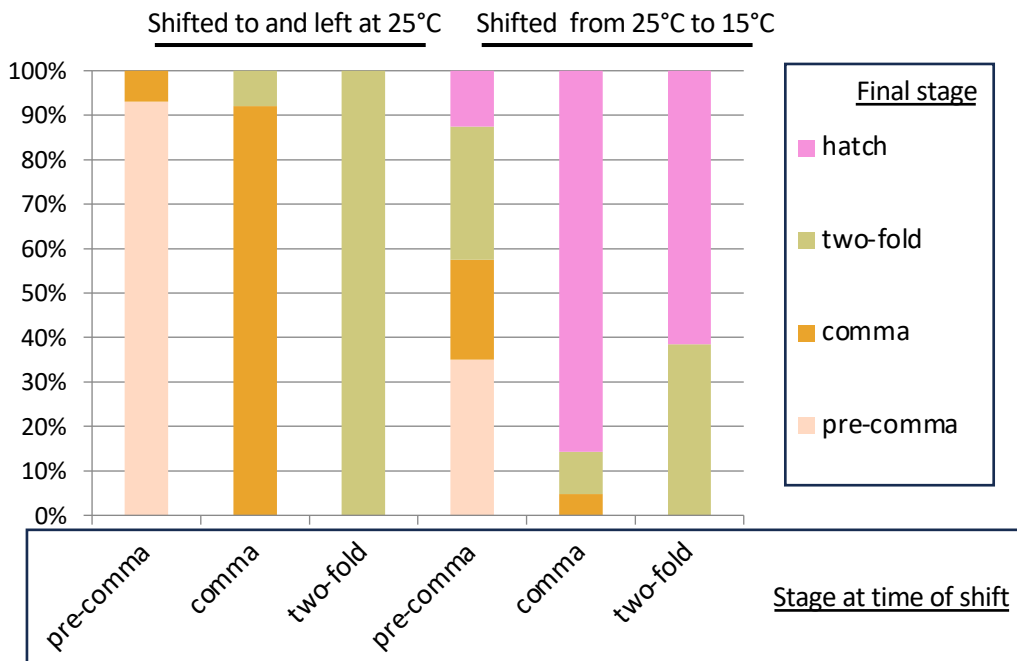

B

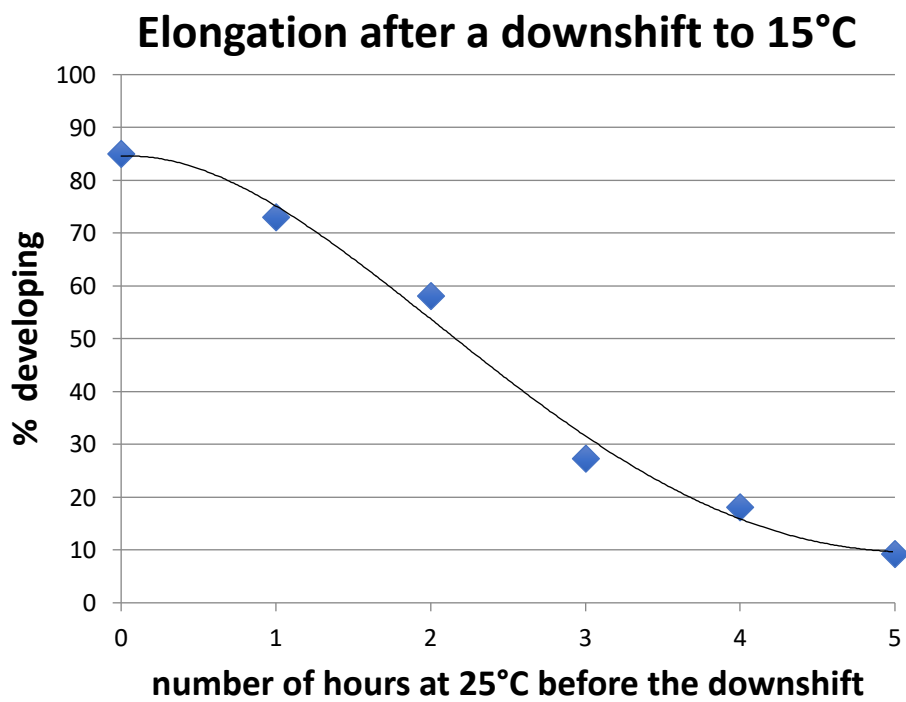

Figure 3

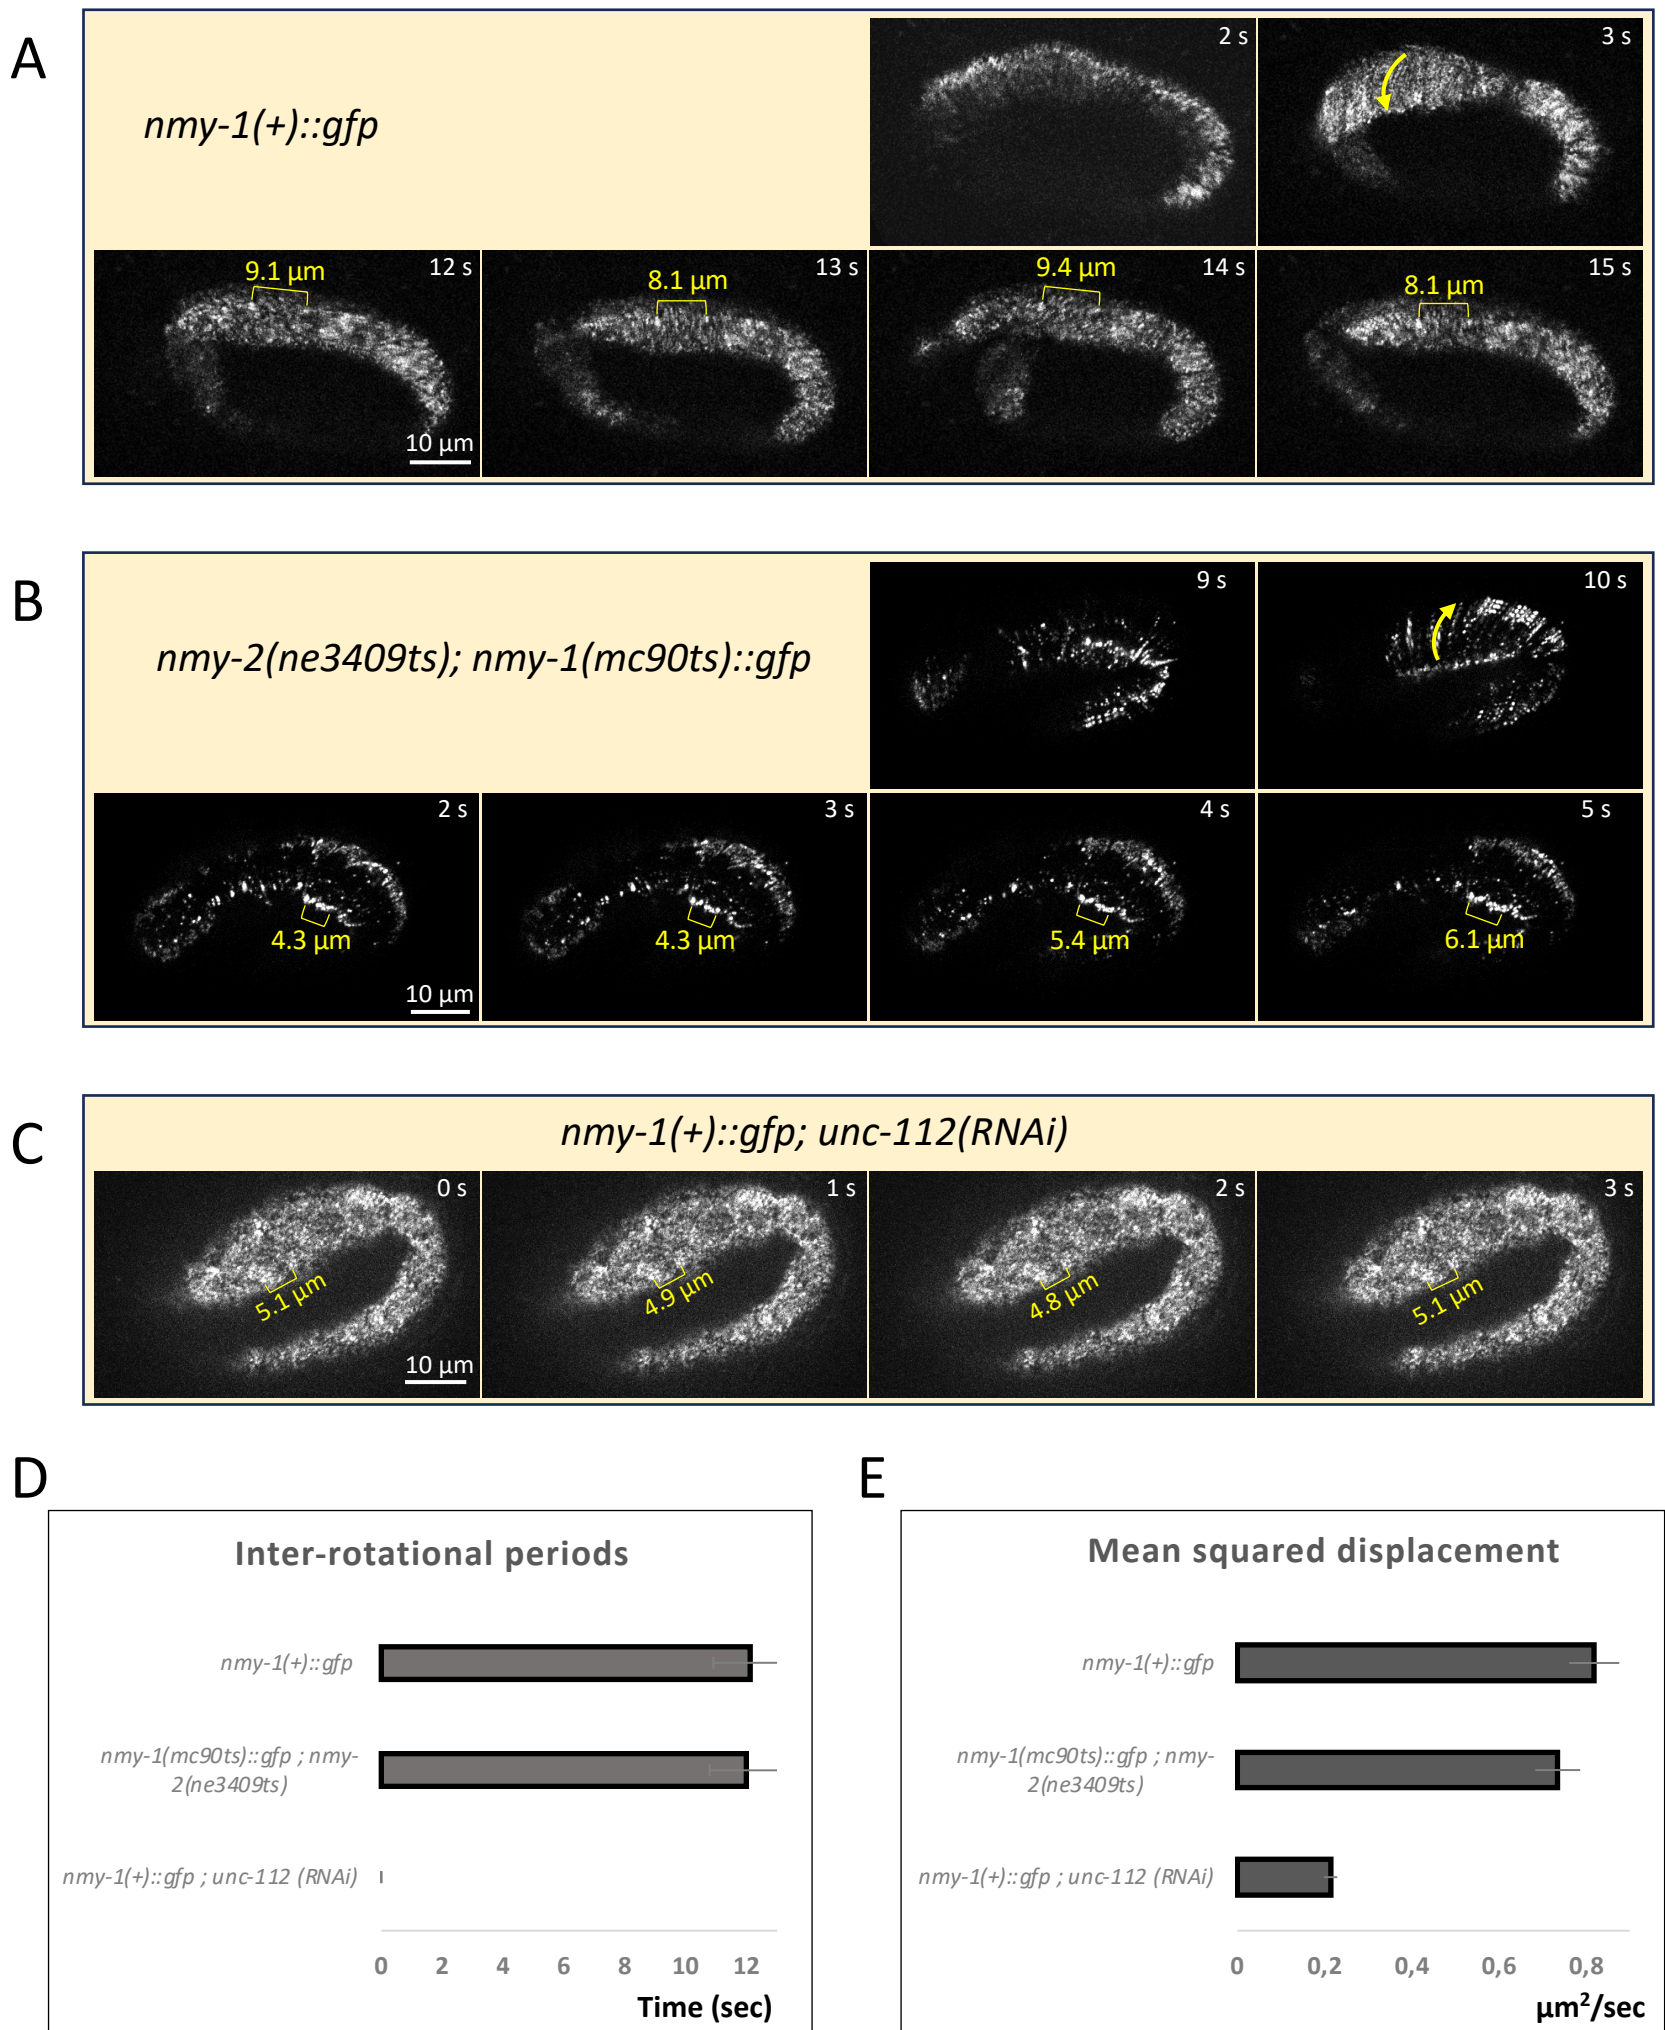

**Figure 4**

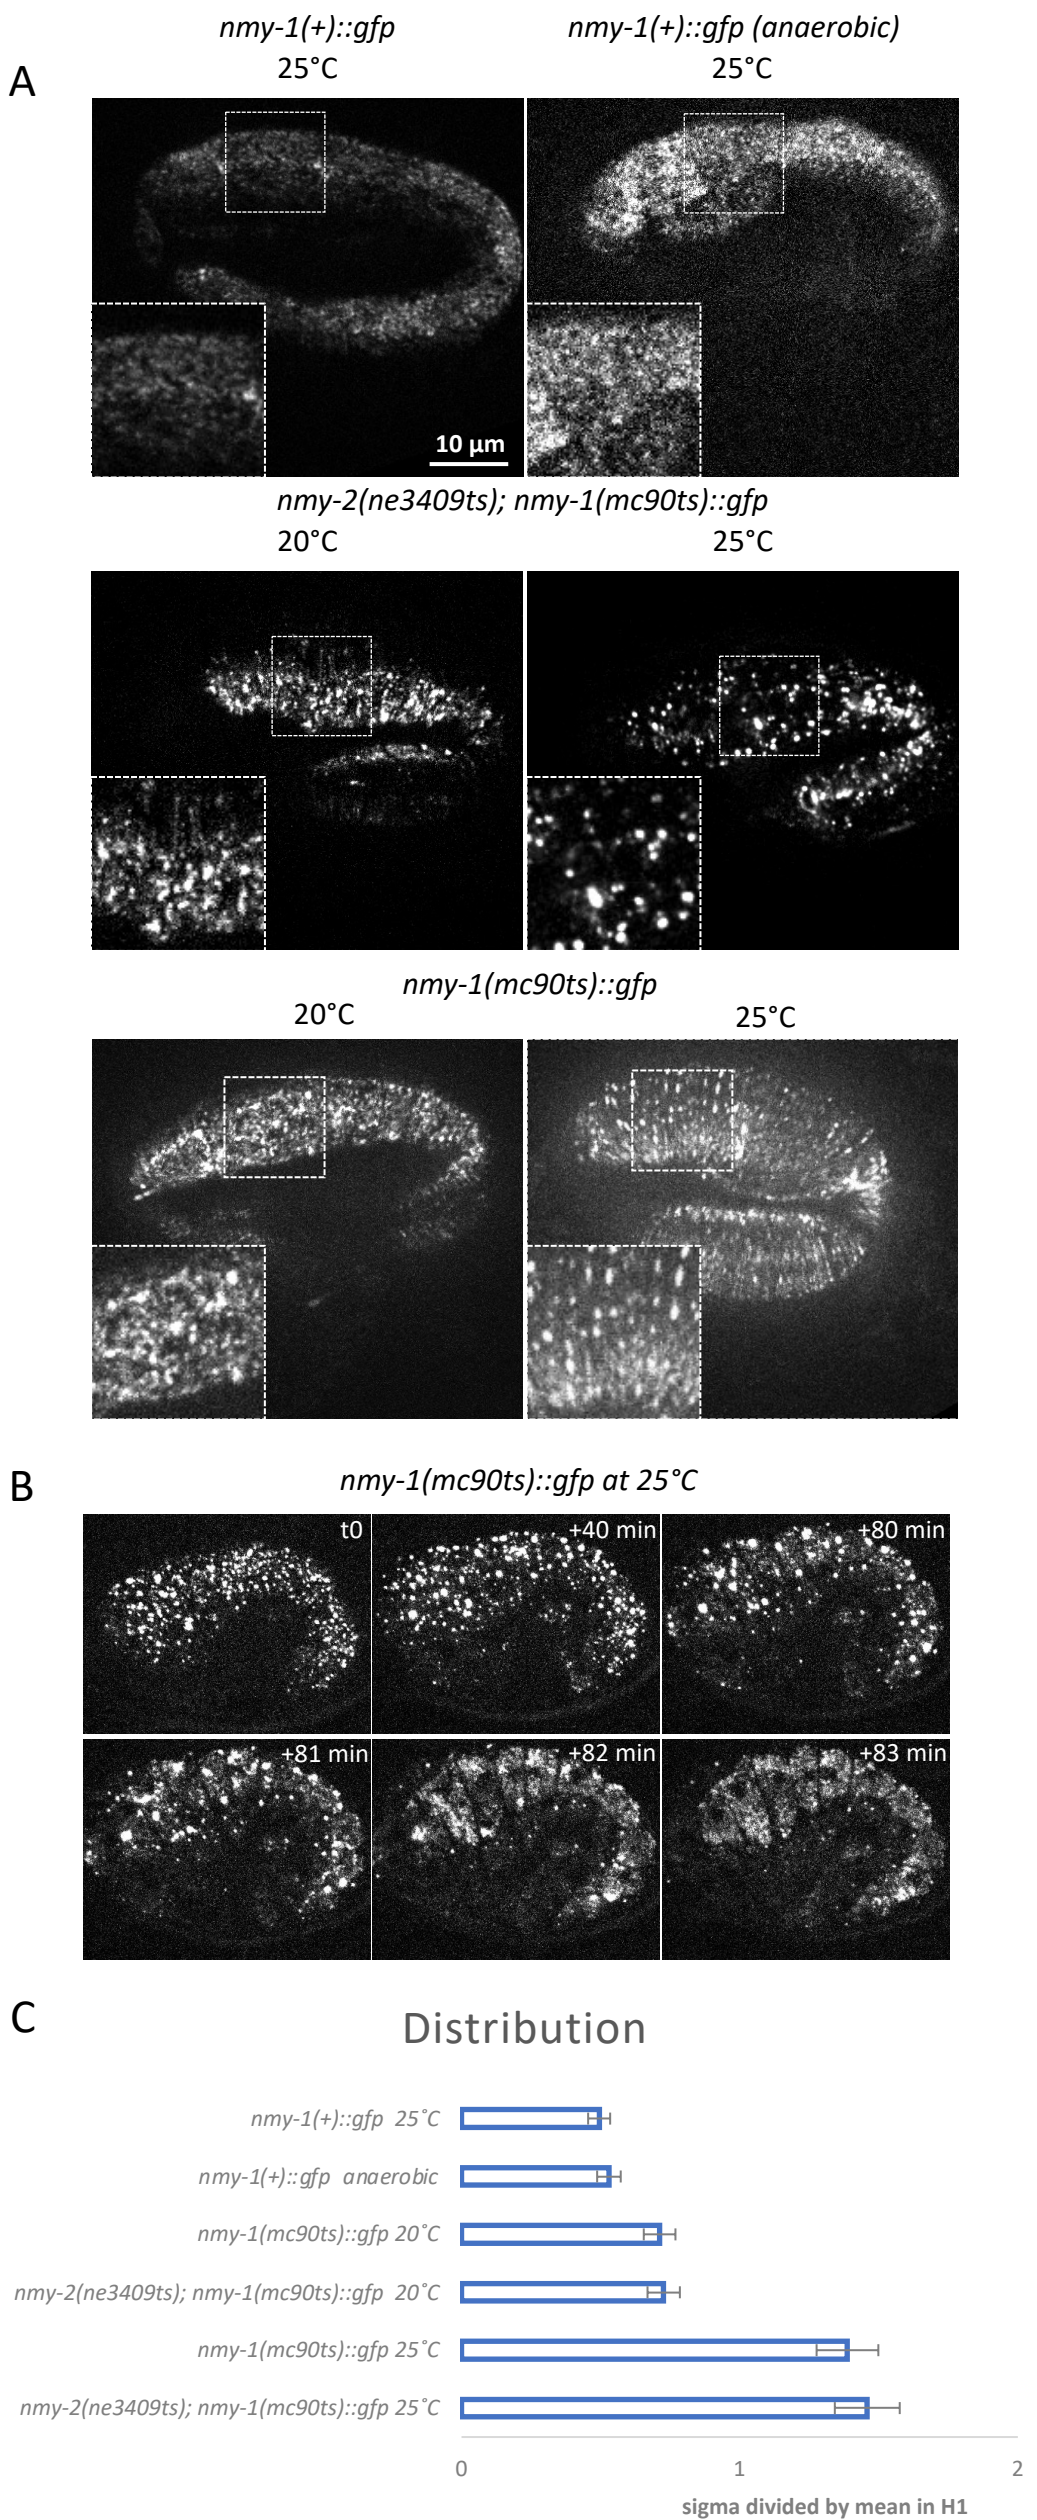

**Figure 5**

Figure S1

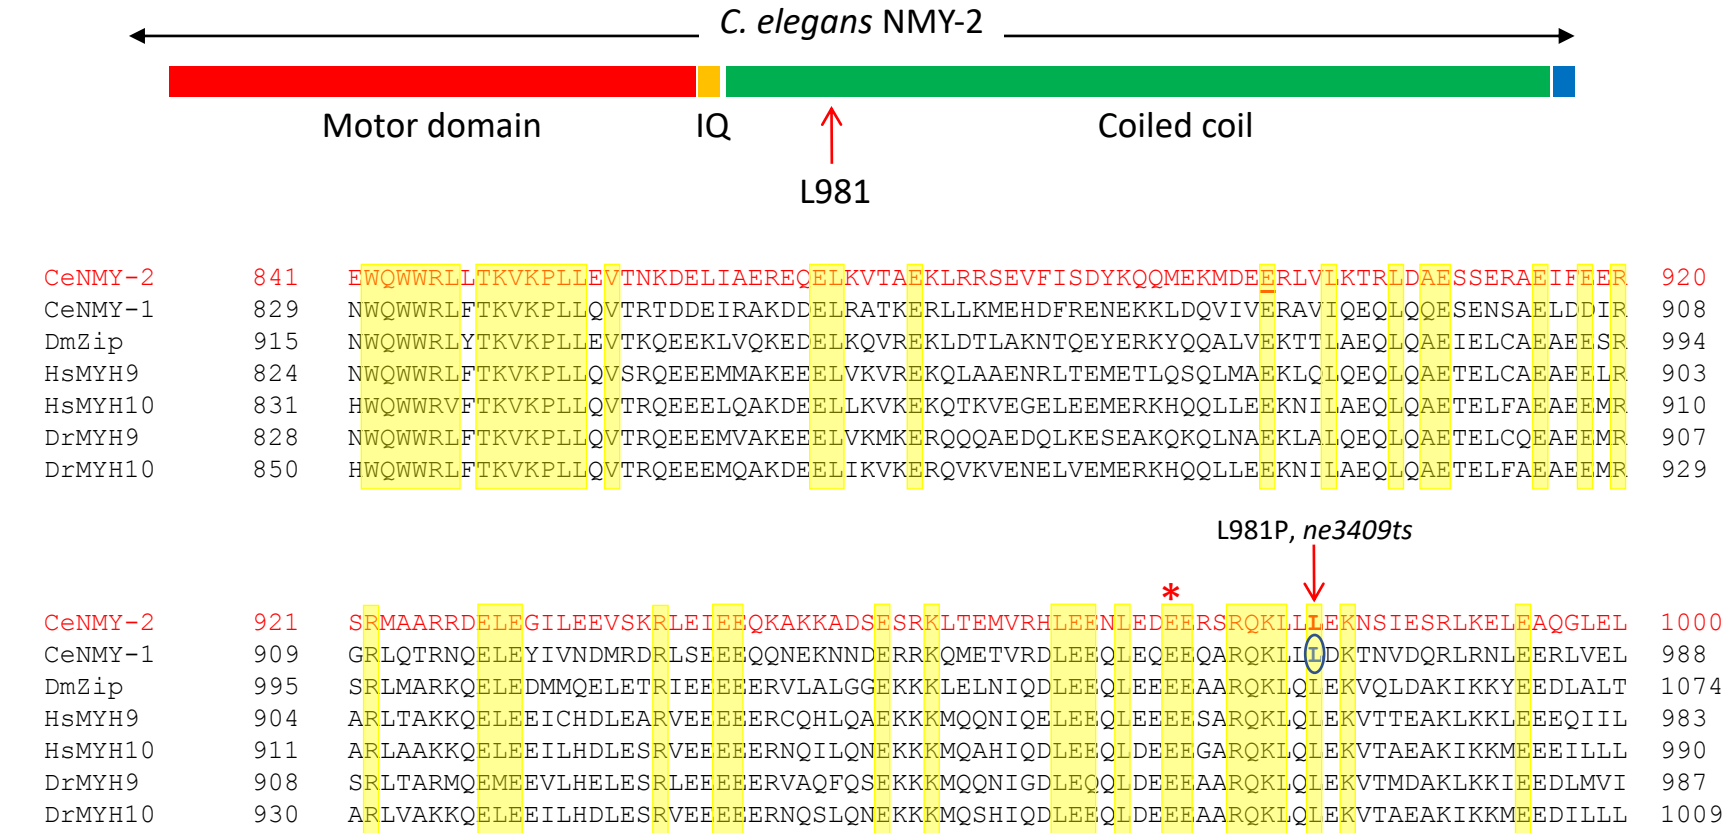

Supplementary Figure 1

**Table 1**

| Genotype                            | 20°C | 25°C |
|-------------------------------------|------|------|
| wild-type                           | 556  | 651  |
| <i>nmy-1(mc90ts)</i>                | 26   | 5    |
| <i>nmy-2(ne3409ts)</i>              | 463  | 261  |
| <i>nmy-2(ne3409); nmy-1(mc90ts)</i> | 8    | 0    |

| Genotype                            | 20°C | 25°C |
|-------------------------------------|------|------|
| wild-type                           | 55,6 | 65,1 |
| <i>nmy-1(mc90ts)</i>                | 2,9  | 0,5  |
| <i>nmy-2(ne3409ts)</i>              | 46,3 | 26,1 |
| <i>nmy-2(ne3409); nmy-1(mc90ts)</i> | 0,8  | 0    |

**Table S1**

| Strain name | Genotype                                                                                   | Reference          |
|-------------|--------------------------------------------------------------------------------------------|--------------------|
| N2          | Wildtype                                                                                   | CGC                |
| FBR241      | <i>nmy-2(cp52[nmy-2::mKate; unc-119(+)] I; unc-119(ed3) III; nmy-1(mc82[nmy-1::gfp]) X</i> | François Robin lab |
| FBR140      | <i>mlc-5(jme09[GFP::mlc-5])III</i>                                                         | François Robin lab |
| ML2540      | <i>nmy-1(mc82[nmy-1::gfp]) X</i>                                                           | 1                  |
| ML2936      | <i>nmy-1(mc90ts)::gfp X</i>                                                                | this work          |
| ML2937      | <i>nmy-2(ne3409ts) I; nmy-1(mc90ts)::gfp X</i>                                             | this work          |
| WM179       | <i>nmy-2(ne3409ts) I</i>                                                                   | CGC                |

1. VUONG-BRENDER et al. 2017
